1  
2  
3  
4  
5  
6  
7  
8  
9  
10  
11  
12  
13  
14  
15  
16  
17  
18  
19  
20  
21  
22  
23

**FRAWLEY ET AL.: ETHNOBOTANICAL STUDY OF ELYMUS**

Word count: 8080

24 **An ethnobotanical study of the genus *Elymus***

25 Emma S. Frawley<sup>1,3</sup>, Claudia Ciotir<sup>1,2</sup>, Brooke Micke<sup>1</sup>, Matthew J. Rubin<sup>3</sup>, and Allison J.

26 Miller<sup>1,2,3</sup>

27 <sup>1</sup>*Saint Louis University, St. Louis, Missouri, USA.*

28 <sup>2</sup>*Missouri Botanical Garden, St. Louis, Missouri, USA.*

29 <sup>3</sup>*Donald Danforth Plant Science Center, St. Louis, Missouri, USA.*

30 **Abstract**

31 Grains of domesticated grasses (Poaceae) have long been a global food source and  
32 constitute the bulk of calories in the human diet. Recent efforts to establish more sustainable  
33 agricultural systems have focused in part on the development of herbaceous, perennial crops.  
34 Perennial plants have extensive root systems that stabilize soil and absorb water and nutrients at  
35 greater rates than their annual counterparts; consequently, perennial grasses are important  
36 potential candidates for grain domestication. While most contemporary grass domesticates  
37 consumed by humans are annual plants, there are over 7,000 perennial grass species that remain  
38 largely unexplored for domestication purposes. Documenting ethnobotanical uses of wild  
39 perennial grasses could aid in the evaluation of candidate species for *de novo* crop development.  
40 The objectives of this study are 1) to provide an ethnobotanical survey of the grass genus  
41 *Elymus*; and 2) to investigate floret size variation in species used by people. *Elymus* includes  
42 approximately 150 perennial species distributed in temperate and subtropical regions, of which at  
43 least 21 taxa have recorded nutritional, medicinal, and/or material uses. *Elymus* species used for  
44 food by humans warrant pre-breeding and future analyses to assess potential utility in perennial  
45 agricultural systems.

46 **Key Words**

47 *Elymus*, ethnobotany, fruit morphology, perennial agriculture, domestication, Poaceae.

48

## 49 **Introduction**

50 It is estimated that between 20% to 50% of the nearly 400,000 extant plant species in the  
51 world may be edible to humans (Füleky 2009; Warren 2015); however, only 6,000 of these have  
52 been cultivated for human consumption (FAO 2019). Cereals, members of the grass family  
53 (Poaceae), include several widely cultivated species, such as barley (*Hordeum vulgare* L.), maize  
54 (*Zea mays* L.), oats (*Avena sativa* L.), rice (*Oryza sativa* L.), rye (*Secale cereale* L.), sorghum  
55 (*Sorghum bicolor* L. Moench), sugarcane (*Saccharum officinarum* L.), and wheat (*Triticum*  
56 *aestivum* L.), among others (NGS 2008). Cereals are a staple of the human diet and comprise 50  
57 percent of global caloric intake (Awika 2011; Warren 2015). Maize, rice, wheat, and sugarcane  
58 account for over half of the total crop production worldwide (FAO 2019), indicating their  
59 importance in the global food system and the relatively small number of grass species used in  
60 modern agriculture (e.g., Khoury et al. 2014).

61 Cereal domestication began at least 12,000 years ago and resulted in morphological and  
62 genetic changes in cultivated plants relative to their wild progenitors (Glémin and Bataillon  
63 2009; Olsen 2013a; Olsen 2013b). For example, domesticated grass species exhibit a reduction  
64 in axillary branching, synchronization of maturation, and easy threshing (Zohary et al. 2012).  
65 Further, domesticated grasses have larger seeds that require reduced stratification and display  
66 decreased dormancy, shattering, and reduced or absent awns (Glémin and Bataillon 2009, Harlan  
67 et al. 1973; Harlan 1992). These characteristics contribute to more uniform harvest time, plants  
68 that can be grown in denser stands, increased seedling vigor, and more efficient harvesting  
69 (Glémin and Bataillon 2009). Subsequent crop improvement programs have focused largely on

70 enhanced grain production and nutritional qualities of domesticated grasses, resulting in  
71 important alterations to a variety of seed traits, among other characteristics.

72 Grass species involved in early domestication processes were almost exclusively annuals  
73 (NGS 2008), perhaps due to their high seed output (Cox 2009), adaptation to early agricultural  
74 lands (DeHaan and Van Tassel 2014), and/or response to early selection efforts targeting  
75 synchronized maturation (Glémin and Bataillon 2009). However, ecological impacts of  
76 agricultural systems based on annual plants, including ongoing soil erosion and soil degradation  
77 (e.g. Montgomery 2007) have turned attention to the potential role of herbaceous, perennial  
78 species in contemporary agricultural systems. Perennials have deep root systems and longer  
79 growing seasons resulting in reduced erosion risk and greater plant productivity over time  
80 (Glover et al. 2010). Additionally, perennial species may be better adapted to temperature  
81 increases driven by climate change, as they are less affected by changes in the uppermost soil  
82 layer (Cox et al. 2006). As such, perennial crops may have an important role to play in the  
83 development of more sustainable agricultural systems (Bommarco et al. 2013; Cassman 1999;  
84 Ciotir et al. 2016; Ciotir et al. 2019; Cox et al. 2002; Doré et al. 2011; FAO 2009; Glover et al.  
85 2010; Tittonell 2014).

86 Despite their potential utility, very few perennial grasses have been domesticated (Van  
87 Tassel et al. 2010). Several hypotheses have been proposed to explain the near absence of  
88 perennial, herbaceous crops. For example, some have suggested that their conservative resource  
89 allocation to reproductive structures relative to vegetative structures hinders response to selection  
90 for increased seed; others have proposed that herbaceous perennial plants exhibit reduced  
91 competitive ability in agricultural habitats compared to annual species (DeHaan et al. 2010;  
92 DeHaan and Van Tassel 2014). However, expanding understanding of agro-ecology, combined

93 with new tools and analytical approaches, is driving increasing interest in pre-breeding of wild,  
94 herbaceous, perennial species. Several herbaceous, perennial species are currently under  
95 development, including perennial rice, sorghum, and wheat, among others (e.g., Cox et al. 2018;  
96 DeHaan et al. 2016; Huang et al. 2018).

97         There are two primary ways in which perennial grass crops can be developed (DeHaan  
98 and Van Tassel, 2014). First, annual crops can be hybridized with their perennial wild relatives.  
99 This serves to introgress annual traits (like high yield, abiotic stress tolerance) into a perennial  
100 background (e.g. perennial wheat (*Triticum aestivum* x *Thinopyrum intermedium*) (DeHaan et al.  
101 2018; Hayes et al. 2018) or vice versa. A second means of developing perennial grass crops is  
102 through *de novo* domestication of wild species, as is underway, for example, with the wild wheat  
103 relative Kernza (*T. intermedium* (Host) Barkworth & D.R. Dewey) at the Land Institute (Salina,  
104 KS). However, one of the current challenges for *de novo* domestication is the identification of  
105 wild species for inclusion in pre-breeding programs (Ciotir et al. 2019).

106         When investigating wild plant species with potential utility in perennial agricultural  
107 systems it is valuable to consider historical and contemporary ethnobotanical uses, as well as  
108 their fundamental morphological features and geographic distributions. Ethnobotanical and other  
109 data on plant diversity and use, including records of plant form preserved in herbarium  
110 specimens, are often housed in botanical gardens and museums (Miller et al. 2015). These  
111 records offer a unique opportunity to explore agriculturally relevant questions about potential  
112 candidates for domestication. For example, within a particular genus of grasses, how many  
113 species are perennial? How many species have been used by people, what parts of the plant have  
114 been used, and for what purposes?

115         *Elymus* L. (wild rye) is an appealing genus for perennial grain domestication because of

116 its compact and determinate inflorescence structure, capacity to self-pollinate, and current use as  
117 forage, among other characteristics. Several *Elymus* species have been developed as forage  
118 cultivars (e.g. blue wildrye (*E. glaucus* Buckley), thickspike wheatgrass (*E. lanceolatus* Scrib. &  
119 J.G. S.M), Canada wild rye (*E. canadensis* L.), slender wheatgrass (*E. trachycaulus* Link), Snake  
120 River wheatgrass (*E. wawawaiensis* J. Carlson & Buckley) and Virginia wildrye (*E. virginicus*  
121 L.) (Aubry et al. 2005; Lloyd-Reilley 2010; Tilley et al. 2011). To date, multiple *Elymus* species  
122 have been hybridized in a variety of pre-breeding initiatives. For example, there are at least  
123 seventeen *Elymus*-wheat hybrids (Cox et al. 2002) that have been developed for drought and salt  
124 tolerance (i.e. *Elymus mollis* Trin. x *Triticum durum* Desf.; Fatih 1983) and scab resistance (i.e.  
125 *E. trachycaulus* x *T. aestivum* L., *E. tsukushiensis* Honda x *T. aestivum*; Kole 2011; Wang et al.  
126 1999). Other *Elymus* hybrids include *Elymus hoffmannii* R.B. Jensen & R.H. Assay, an advanced  
127 generation hybrid between quackgrass (*E. repens* L.) and bluebunch wheatgrass  
128 (*Pseudoroegneria spicata* (Pursh) Á. Löve) with drought and salinity tolerance (St. John 2010).  
129 This work indicates *Elymus* is amenable to breeding processes and that some species within the  
130 genus may hold promise for perennial grain crop development.

131 In this study we investigate *Elymus* to provide information that might facilitate evaluation  
132 of species for use in *de novo* domestication processes. The specific objectives of this study were  
133 to: 1) conduct an ethnobotanical survey of the genus *Elymus*; and 2) investigate floret size in  
134 species used by people. These data provide valuable information about *Elymus* use and floret  
135 size variation, and underscore how ethnobotanical studies can aid agricultural processes through  
136 the evaluation of wild species and their potential applications in pre-breeding processes.

137

138 **Methods**

139 ***Study System***

140 *Elymus* includes approximately 150 wild, herbaceous, perennial species distributed across  
141 North Temperate regions (Barkworth 2007; Lu 1993), including 39 species that occur in North  
142 America (32 of which are native; Barkworth 2007). *Elymus* caryopses (grains) are typically  
143 oblong to oblong-linear and adherent to the lemma and palea with hairy apices (Barkworth 2007;  
144 Chen and Zhu 2006; Lu 1993). Inflorescences are erect spikes with one to three spikelets at each  
145 node. Spikelets are ordinarily sessile with one to 11 florets. The lower florets are typically  
146 functional, and the distal florets are often reduced (Barkworth 2007; Chen and Zhu 2006;  
147 Kellogg 2015). Species that occur in western and northern North America have solitary spikelets,  
148 whereas those found east of the Rocky Mountains have multiple spikelets per node (Barkworth  
149 2007).

150

151 ***Inclusion of Leymus***

152 Since the initial description of *Elymus* by Linnaeus, its taxonomy has varied under  
153 different taxonomic treatments (Helfgott and Mason-Gamer 2004; Lu 1993). Of particular  
154 interest to this study is the genus *Leymus* Hochst., whose species have often been included in  
155 circumscriptions of *Elymus*. Three *Leymus* species presented in this survey, *L. cinereus* (Scribn.  
156 & Merr.) Á. Löve, *L. condensatus* (J. Presl) Á. Löve, and *L. triticoides* (Buckley) Pilg., were  
157 originally described as *Elymus* species by previous authors (*E. cinereus* Scribn. & Merr., *L.*  
158 *condensatus* J. Presl, and *E. triticoides* Buckley), but are now considered synonyms for *Leymus*.  
159 We included these species in our results because some ethnobotanical descriptions surveyed here  
160 treat them as *Elymus*, and all three were used extensively by indigenous communities in the  
161 American southwest.

162  
163  
164  
165  
166  
167  
168  
169  
170  
171  
172  
173  
174  
175  
176  
177  
178  
179  
180  
181  
182  
183  
184

***Ethnobotanical analysis of Elymus***

We performed a literature review to investigate recorded uses of *Elymus* species. We surveyed 121 print resources accessed at the Peter H. Raven Library at the Missouri Botanical Garden library. We reviewed 1) general ethnobotanical studies carried out in regions in which *Elymus* is known to occur; 2) ethnobotanical studies focused specifically on cultures of native communities located in these regions; and 3) global assessments of edible plants. We surveyed two online ethnobotany databases, *Native American Ethnobotany Database* (<http://naeb.brit.org/>) and *Plants for a Future* (<https://pfaf.org/>), and two online scientific databases, *JSTOR* (<http://www.jstor.org>) and *Web of Science* (<http://www.webofknowledge.com/WOS>) for relevant information about *Elymus*. We collected data on historical use by indigenous communities, human and animal edibility, cultivation history, and the uses of different plant parts. Results were recorded in the Perennial Agriculture Project Global Inventory online database (<http://www.tropicos.org/Project/PAPGI>). We also collected data on geographic distributions from specimen data at the Missouri Botanical Garden herbarium and from the Global Biodiversity Information Facility ([www.gbif.org](http://www.gbif.org)). Ethnobotanical uses were categorized as food, forage, medicine, and/or material. The food category included species that were consumed by humans; the forage category identified species cultivated for growth in pastures and for consumption by livestock; the medicine category designated species that were used in ceremonial decoctions or had therapeutic or healing utilities; finally, the material group covered species used as tools, housewares, and in construction, as well as other applications as raw materials.



185 ***Measurements of floret traits from herbarium specimens***

186 Grain morphology is an important target of selection in grass species undergoing  
187 domestication for human consumption (Glemín and Batallion 2009). While many wild species  
188 have relatively small, long, thin grains, selection during domestication generally favors larger,  
189 rounder grains (Gegas 2010; Okamoto 2012; Stougaard and Xue, 2004). We were interested in  
190 surveying grain size variation in species with documented ethnobotanical uses. We hypothesized  
191 that *Elymus* species used for human consumption may display larger grain sizes than those used  
192 for other purposes. A definition of the “pure seed unit” for crop conditioning is the floret: the  
193 reproductive structure including the lemma, palea, and caryopsis (grain), and excluding the awn  
194 when the awn length is longer than that of the entire floret (Gregg and Billups 2010). There is a  
195 positive correlation between floret cavity size (volume) and grain growth, including grain size  
196 and weight (Millet and Pinthus 1984; Millet 1986).

197 We calculated floret area for *Elymus* species with documented histories of use to examine  
198 relationships between floret size, ethnobotanical use, and collection location. Our ethnobotanical  
199 analysis identified 21 species with ethnobotanical uses (see results below). For each of these 21  
200 species, we selected *Elymus* specimens from the herbarium at the Missouri Botanical Garden  
201 based on their collection location, targeting specimens that had been collected in a country or  
202 state where *Elymus* use by indigenous communities had been documented (Figure 1). If there  
203 was no indigenous community specifically identified for a taxon, we selected a specimen from  
204 the species known native range. For example, because *E. canadensis* was used historically in  
205 Utah and Colorado, sampled specimens came from these states (Table 1).

Herbarium Specimen Collection Locations

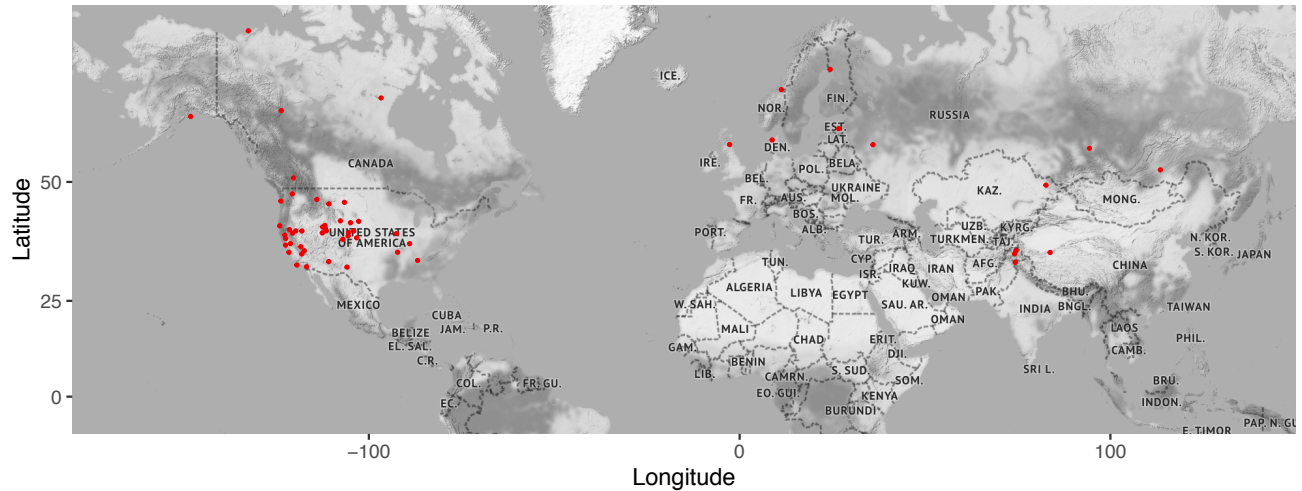

206

207 **Figure 1.** Geographic locations of collection sites for all specimens measured across 21 *Elymus*  
 208 species. Collection site determined from herbarium specimen label.

| Species                                    | Use Distribution                                                 | Native Range                     |
|--------------------------------------------|------------------------------------------------------------------|----------------------------------|
| <i>E. arenarius</i> (L.)                   | Eurasia (NOR)                                                    | Eurasia                          |
| <i>E. canadensis</i> (L.)                  | North America (UT, CO)                                           | North America                    |
| <i>E. caninus</i> (L.)                     | Eurasia (RUS, CHN)                                               | Temperate Asia                   |
| <i>E. elongatus</i> (Host.)                | North America (USA, CAN)                                         | Eurasia                          |
| <i>E. elymoides</i> (Raf.)                 | North America (CA)                                               | North America,<br>Temperate Asia |
| <i>E. fibrosus</i> (Schrenk)               | Eurasia (RUS)                                                    | Temperate Asia                   |
| <i>E. glaucus</i> (Buckley)                | North America (CA, NM, BC)                                       | North America,<br>Temperate Asia |
| <i>E. hystrix</i> (Moench)                 | North America (FL)                                               | North America                    |
| <i>E. lanceolatus</i> (Scribn. & J.G. Sm.) | North America (USA, CAN)                                         | North America,<br>Temperate Asia |
| <i>E. mollis</i> (Trin.)                   | North America (AK, BC, WA)                                       | North America,<br>Eurasia        |
| <i>E. multisetus</i> (J.G. Sm.)            | North America (CA)                                               | North America                    |
| <i>E. mutabilis</i> (Drobow)               | Eurasia (RUS)                                                    | Eurasia                          |
| <i>E. repens</i> (L.)                      | North America (USA, CAN); Eurasia (FIN, SWE, RUS, TUR, BIH, IRL) | Eurasia                          |
| <i>E. semicostatus</i> (Nees ex Steud.)    | North America (USA); Eurasia (JPN)                               | Asia                             |
| <i>E. sibiricus</i> (L.)                   | North America (UT); Eurasia (RUS)                                | North America,<br>Eurasia        |
| <i>E. smithii</i> (Rydb.)                  | North America (USA, CAN)                                         | North America                    |
| <i>E. spicatus</i> (Pursh)                 | North America (USA)                                              | North America                    |
| <i>E. trachycaulus</i> (Link)              | North America (USA, CAN); Eurasia (RUS)                          | North America,<br>Eurasia        |
| <i>L. cinereus</i> (Scribn. & Merr.)       | North America (AB, BC, MT, UT, CA)                               | North America                    |
| <i>L. condensatus</i> (J. Presl)           | North America (UT, CA)                                           | North America                    |
| <i>L. triticoides</i> (Buckley)            | North America (CA)                                               | North America                    |

209

210 **Table 1.** Native ranges and location of ethnobotanical use for 21 *Elymus* species.

211  
212 To investigate inter- and intra-specific variation in floret area in species used by people  
213 we sampled three herbarium specimens per species and harvested eight florets from each  
214 specimen, with the exception of *E. semicostatus* Nees ex Steud., for which only two herbarium  
215 specimens existed. For every specimen, we recorded the location of collection, accession and  
216 collection number, collection date, collector, and latitude and longitude when available  
217 (Appendix 1). We removed the glumes to reveal the caryopsis enclosed by the adherent palea  
218 and the lemma. We imaged florets in high resolution (iPhone XR, DPI 326) at the Missouri  
219 Botanical Garden herbarium and measured area in ImageJ (v. 1.50i). We returned plant material  
220 to the fragment packet on the herbarium sheet following imaging. We cropped each image to  
221 encompass only the seeds, then converted the image to binary to analyze particles for individual  
222 and average floret area (mm<sup>2</sup>). Raw data for floret area is available in Appendix 2. We fit linear  
223 models in R (v. 1.0.143, RStudio Team 2015) and SAS (v. 9.4, SAS Institute 2017) to investigate  
224 three main questions: 1) does individual floret area differ between species and among replicates  
225 within a species, 2) do average floret areas vary with ethnobotanical uses in a given region, and  
226 3) is there an association between average floret area and latitude and longitude? While *Elymus*  
227 *hystrix* Moench was described in the literature as being used medicinally, its specific application  
228 (maize seed germination: Table 2) was not consistent with the other species' medicinal uses.  
229 Therefore we removed *E. hystrix* when testing for an effect of medicinal usage on floret size.

| Species                                      | Indigenous Communities                                                                                               | Plant Part Used                                   | Food Uses                                                                                                                                                                                                               | Medicinal Uses                                                                                                                                                                                                                                                                                                                                                                                              | Forage Uses                                                                                                                              | Material Uses                                                                                                                                         | References                                                                                                                              |
|----------------------------------------------|----------------------------------------------------------------------------------------------------------------------|---------------------------------------------------|-------------------------------------------------------------------------------------------------------------------------------------------------------------------------------------------------------------------------|-------------------------------------------------------------------------------------------------------------------------------------------------------------------------------------------------------------------------------------------------------------------------------------------------------------------------------------------------------------------------------------------------------------|------------------------------------------------------------------------------------------------------------------------------------------|-------------------------------------------------------------------------------------------------------------------------------------------------------|-----------------------------------------------------------------------------------------------------------------------------------------|
| <i>E. arenarius</i> (L.)                     | Unspecified                                                                                                          | Unspecified                                       | Unspecified                                                                                                                                                                                                             | Unspecified                                                                                                                                                                                                                                                                                                                                                                                                 | Unspecified                                                                                                                              | Twisting ropes and making brooms.                                                                                                                     | Hooker 1839; Moerman 1998.                                                                                                              |
| <i>E. canadensis</i> (L.)                    | Gosiute (G), Iroquois (I), Kiowa (K), Ute (U), Paiute (P)                                                            | Seeds, roots, and foliage                         | Gathered (G, U), ground into flour, used to make bread, cereals, rye casserole.                                                                                                                                         | Compound decoction of roots taken for the kidneys (I).                                                                                                                                                                                                                                                                                                                                                      | Fodder (K); forage for deer, antelope, and buffalo (P); cultivated as a pasture grass (P).                                               | Unspecified                                                                                                                                           | Facciola 1990; Kindscher 1987; Kunkel 1984; Moerman 1998; Tanaka 1976; Yanovsky 1936.                                                   |
| <i>E. caninus</i> (L.)                       | Unspecified                                                                                                          | Unspecified                                       | Unspecified                                                                                                                                                                                                             | Unspecified                                                                                                                                                                                                                                                                                                                                                                                                 | Forage grass.                                                                                                                            | Unspecified                                                                                                                                           | Hanelt 2001.                                                                                                                            |
| <i>E. elongatus</i> (Host.)                  | Unspecified                                                                                                          | Unspecified                                       | Unspecified                                                                                                                                                                                                             | Unspecified                                                                                                                                                                                                                                                                                                                                                                                                 | Hay and pasture crop.                                                                                                                    | Unspecified                                                                                                                                           | Hanelt 2001.                                                                                                                            |
| <i>E. elymoides</i> (Raf.)                   | Navajo (N), Ramah (R), Potter Valley Pomo (PVP)                                                                      | Seeds                                             | As pinole, considered second best quality after wild oats (PVP).                                                                                                                                                        | Unspecified                                                                                                                                                                                                                                                                                                                                                                                                 | Young plants used for sheep and horse feed (N, R).                                                                                       | Unspecified                                                                                                                                           | Moerman 1998; Welch 2013.                                                                                                               |
| <i>E. fibrosus</i> (Schrenk)                 | Unspecified                                                                                                          | Unspecified                                       | Unspecified                                                                                                                                                                                                             | Unspecified                                                                                                                                                                                                                                                                                                                                                                                                 | Minor forage crop.                                                                                                                       | Unspecified                                                                                                                                           | Clayton et al. 2006; Hanelt 2001.                                                                                                       |
| <i>E. glaucus</i> (Buckley)                  | Karok (KA), Keres (KE), Gitksan (GI)                                                                                 | Seeds                                             | As porridge (seeds parched, pounded into a flour, and mixed with water into a paste), cooked, or ground into bread flour (KA).                                                                                          | To settle quarrels between families or individuals (KA).                                                                                                                                                                                                                                                                                                                                                    | Forage for deer, antelope, and buffalo; potential pasture and forage crop.                                                               | Used in socks and stuffing inside moccasins, as baby bedding, and to cover ground where people sat around fire (GI).                                  | Couplan 1998; Ebeling 1986; Hanelt 2001; Moerman 1998; Schenck 1952; Smith 1997; Smith Jr. 2014; Tanaka 1976; Yanovsky 1936.            |
| <i>E. hystrix</i> (Moench)                   | Iroquois                                                                                                             | Unspecified                                       | Unspecified                                                                                                                                                                                                             | Ceremonial: decoction for corn seeds (I).                                                                                                                                                                                                                                                                                                                                                                   | Unspecified                                                                                                                              | Unspecified                                                                                                                                           | Austin 2004.                                                                                                                            |
| <i>E. lanceolatus</i> (Scribn. & J.G. Sm.)   | Unspecified                                                                                                          | Unspecified                                       | Unspecified                                                                                                                                                                                                             | Unspecified                                                                                                                                                                                                                                                                                                                                                                                                 | Cultivated as forage grass and pasture crop.                                                                                             | Unspecified                                                                                                                                           | Hanelt 2001.                                                                                                                            |
| <i>E. mollis</i> (Trin.)                     | Nitinaht (NI), Makah (M), Haida (H), Nunivak Eskimo (NE)                                                             | Seeds, stems, leaves, and roots                   | Seeds eaten.                                                                                                                                                                                                            | Roots twisted together to form rope, rubbed on the bodies of young men for strength (NI); basal portion of stem chewed for incontinence (M).                                                                                                                                                                                                                                                                | Unspecified                                                                                                                              | Tough leaves used for sewing (NI), plants gathered, split, dyed, and used in basketry and mats (H, NE).                                               | Couplan 1998; Turner et al. 1983; Turner 2010; Lantis 1946.                                                                             |
| <i>E. multisetus</i> (J.G. Sm.)              | Kawaiisu (KW)                                                                                                        | Seeds                                             | Pounded into a porridge/mush (KW).                                                                                                                                                                                      | Unspecified                                                                                                                                                                                                                                                                                                                                                                                                 | Unspecified                                                                                                                              | Unspecified                                                                                                                                           | Moerman 1998; Smith Jr. 2014.                                                                                                           |
| <i>E. mutabilis</i> (Drobow)                 | Unspecified                                                                                                          | Unspecified                                       | Unspecified                                                                                                                                                                                                             | Unspecified                                                                                                                                                                                                                                                                                                                                                                                                 | Frost-resistant forage grass.                                                                                                            | Unspecified                                                                                                                                           | Hanelt 2001.                                                                                                                            |
| <i>E. repens</i> (L.)                        | Apache (A), White Mountain (WM), Cherokee (CHE), Gosiute, Iroquois, Okanagan-Colville (OC), Lukomir Highlanders (LH) | Seeds, stems, rhizomes, roots, shoots, and leaves | Roots dried, ground into meal, and substituted for bread; rhizomes dried and ground, roasted for coffee, or boiled into a syrup for beer; seeds, tips of rhizomes, leaves and shoots eaten raw; seed mashed (A; WM; G). | Orthopedic and urinary aid (CHE; I); decoction used to wash swollen legs and infusion taken for gravel, incontinence, and bedwetting (CHE); roots infused to make kidney and genitourinary treatment; rhizomes to treat kidney, liver, and urinary problems; worm expellant (I); to treat poor eyesight, chest pain, fever, syphilis, jaundice, and swollen and rheumatic limbs; other medicinal uses (LH). | Fodder and forage plant for hay (A; WM), N. American cultivar 'Newhy' promising forage hybrid ( <i>E. repens</i> x <i>E. spicatus</i> ). | Used under and over food in pit cooking (OC).                                                                                                         | Allen and Hatfield 2004; Elliot 2009; Ferrier et al. 2015; Hanelt 2001; Jackson 2014; MacKinnon et al. 2009; Moerman 1998; Sargin 2013. |
| <i>E. semicostatus</i> (Nees ex Steud.)      | Unspecified                                                                                                          | Unspecified                                       | Unspecified                                                                                                                                                                                                             | Unspecified                                                                                                                                                                                                                                                                                                                                                                                                 | Drought-resistant pasture grass.                                                                                                         | Unspecified                                                                                                                                           | Clayton et al. 2006; Hanelt 2001.                                                                                                       |
| <i>E. sibiricus</i> (L.)                     | Gosiute                                                                                                              | Seeds                                             | Yes (G).                                                                                                                                                                                                                | Unspecified                                                                                                                                                                                                                                                                                                                                                                                                 | Infrequently cultivated as forage grass.                                                                                                 | Unspecified                                                                                                                                           | Chamberlin 1911; Clayton et al. 2006; Hanelt 2001; Moerman 1998.                                                                        |
| <i>E. smithii</i> (Rydb.)                    | Unspecified                                                                                                          | Unspecified                                       | Unspecified                                                                                                                                                                                                             | Unspecified                                                                                                                                                                                                                                                                                                                                                                                                 | Cultivated for hay and pasture.                                                                                                          | Unspecified                                                                                                                                           | Clayton et al. 2006; Hanelt 2001.                                                                                                       |
| <i>E. spicatus</i> (Pursh)                   | Unspecified                                                                                                          | Unspecified                                       | Unspecified                                                                                                                                                                                                             | Unspecified                                                                                                                                                                                                                                                                                                                                                                                                 | Forage grass for natural pastures.                                                                                                       | Unspecified                                                                                                                                           | Clayton et al. 2006; Hanelt 2001.                                                                                                       |
| <i>E. trachycaulus</i> (Link)                | Unspecified                                                                                                          | Seeds                                             | Unspecified                                                                                                                                                                                                             | Unspecified                                                                                                                                                                                                                                                                                                                                                                                                 | Cultivated mostly in grass mixtures as forage and pasture plant.                                                                         | Unspecified                                                                                                                                           | Clayton et al. 2006; Hanelt 2001; Smith Jr. 2014.                                                                                       |
| <i>L. cinereus</i> (Scribn. & Merr.) Á. Löve | Paiute, Thompson (T), Blackfoot (B)                                                                                  | Seeds, stems, leaves, and culm                    | Seeds eaten (P).                                                                                                                                                                                                        | Unspecified                                                                                                                                                                                                                                                                                                                                                                                                 | Hay for livestock (T).                                                                                                                   | Stems used for basket imbrication; leaves used to line graves; culms used as "fish spreaders" or for cleaning; grass used as bedding (T).             | Ebeling 1986; Johnston 1970; Turner et al. 1996; Smith Jr. 2014.                                                                        |
| <i>L. condensatus</i> (J. Presl) Á. Löve     | Cahuilla (C), Gosiute, Paiute, Chumash (CH).                                                                         | Stems, seeds                                      | Seeds, whole plant eaten (G; P)                                                                                                                                                                                         | Unspecified                                                                                                                                                                                                                                                                                                                                                                                                 | Unspecified                                                                                                                              | Stems used in arrowmaking (C; CH), roof thatching (C), brush handles, knives, and tobacco pipes. Used in house construction, clothes, and tools (CH). | Bean and Saubel 1972; Couplan 1998; Ebeling 1986; Kindscher 1987; Moerman 1998; Smith Jr. 2014; Timbrook 1984.                          |
| <i>L. triticoides</i> (Buckley) Pilg.        | Paiute, Kawaiisu, Potter Valley Pomo                                                                                 | Seeds                                             | Seeds pounded and cooked to form a thick mush (KW); pinole (PVP).                                                                                                                                                       | Unspecified                                                                                                                                                                                                                                                                                                                                                                                                 | Unspecified                                                                                                                              | Unspecified                                                                                                                                           | Ebeling 1986; Couplan 1998; Smith 1997; Smith Jr. 2014; Welch 2013; Zigmund 1981.                                                       |

230

231 **Table 2.** Compilation of documented ethnobotanical records for 21 *Elymus* species.

232 “Unspecified” denotes where an indigenous community, plant part, or ethnobotanical use was

233 not documented for a given species in the literature we consulted.

234 **Results**

235 ***Ethnobotanical analysis of Elymus***

236           Of the ca. 150 known *Elymus* species, we identified 21 taxa that have documented  
237 ethnobotanical uses by people in North America and/or Eurasia (Table 2). Fifteen species are  
238 used as forage, 12 are used for food, six provide for raw materials for use in the home, and five  
239 are used medicinally. We identified at least 25 different indigenous communities that use *Elymus*  
240 in some capacity. Five Native American communities use more than one species from the genus:  
241 Gosiute (four species), Paiute (four), Kawaiisu (two), Potter Valley Pomo (two), and Iroquois  
242 (two). Additionally, eight taxa in our study are used by more than one indigenous group (*E.*  
243 *canadensis*, *E. elymoides* Raf., *E. glaucus*, *E. mollis*, *E. repens*, *L. cinereus*, *L. condensatus*, and  
244 *L. triticoides*. Forage uses are mainly as fodder, hay, and pasture grass. Food uses primarily  
245 involve the seed, eaten raw (i.e. *E. repens*), as porridge or mash (i.e. *E. glaucus*, *E. multisetus*  
246 J.G. Sm., *E. repens*), or as ‘pinole,’ a coarse flour made from ground seeds (i.e. *E. elymoides*).  
247 Material uses are broad and encompassed many plant parts (culms, leaves, roots, and stems),  
248 most frequently as components of houseware (i.e. basketry, broom handles). Medicinal uses are  
249 equally diverse, with species being used in decoctions, infusions, and washes.

250

251 ***Elymus species used for forage***

252           The most common ethnobotanical use of *Elymus* in our study is forage. Fifteen *Elymus*  
253 species are used for forage by at least one of seven indigenous communities across western  
254 North America (Table 2). Forage uses are primarily for pasture grass, hay for livestock, and  
255 fodder for antelope, buffalo deer, horses, and sheep. Seven species are used exclusively as forage  
256 (there were no ethnobotanical records of use for food, medicine, or material for the species),

257 whereas eight of the *Elymus* species used for forage are also human edible (Table 2). Many  
258 *Elymus* species used as forage have specific environmental tolerances. For example, *E. elongatus*  
259 Host. is used as a saline and alkaline tolerant pasture grass in western North America; *E.*  
260 *canadensis* and *E. smithii* Rydb. are used for revegetation and reseeding of disturbed rangelands,  
261 prairies, and saline soils of the Great Plains; and *E. lanceolatus* aids soil stabilization in the  
262 intermountain region of the United States and Canada (Hanelt 2001). Two additional pasture  
263 grass species (*E. mutabilis* Drobow and *E. semicostatus*) are cultivated for their frost and drought  
264 resistance, respectively (Hanelt 2001). Finally, *E. elymoides* is edible to sheep and horses early in  
265 the season and is used for this purpose by at least two southwestern Native American  
266 communities, the Navajo and Ramah (Barkworth 2007; Moerman 1998).

267

#### 268 ***Elymus* species used for human consumption**

269 Ten *Elymus* species are consumed by people in some form, and we identified six  
270 indigenous communities that used *Elymus* for this purpose (Table 2). *Elymus* species eaten by  
271 humans are: *E. canadensis*, *E. elymoides*, *E. glaucus*, *E. mollis*, *E. multisetus*, *E. repens*, *E.*  
272 *sibiricus* L., *L. cinerius*, *L. condensatus*, and *L. triticoides*. For some species there is no  
273 comprehensive description of preparation method (i.e. *E. mollis*). Several others illuminate  
274 important details on food use; for example, seeds, roots, rhizomes, and leaves of *E. repens* are  
275 consumed, either eaten raw, roasted, as a mash, or in a flour. Likewise, seeds of *E. glaucus*, *E.*  
276 *multisetus*, and *L. triticoides* are parched, ground, and mixed with water to form a type of  
277 porridge. Pinole is also a common preparation method for seed, and it is used as a flour in breads  
278 (*E. canadensis*, *E. elymoides*, *E. glaucus*, *L. triticoides*), cereals, and casseroles (*E. canadensis*).  
279 Notably, *E. elymoides* is considered “second in quality for [pinole]” following wild oats (Welch

280 2013).

281

### 282 *Elymus species used for medicines and materials*

283 *Elymus* medicinal uses vary widely. Three taxa are used to treat renal and incontinence  
284 issues as a diuretic, and two are applied topically to treat swollen limbs (Table 2). *Elymus*  
285 *glaucus* is described by the Karok community as a medicine to help “settle quarrels” between  
286 individuals or families (Moerman 1998; Schenk and Gifford 1952). In other medicinal  
287 applications, roots and stems are either eaten, applied directly, or developed into infusions and  
288 washes. *Elymus hystrix* is described as a “ceremonial medicine” by the Iroquois, and functions as  
289 part of a decoction for maize seeds to enhance germination. The treatment is considered to  
290 contribute to seed vitality and “protection” prior to planting (Austin 2004; Waugh 1916). Six  
291 taxa have material applications (Table 2). Plants are formed into parts of household objects, such  
292 as brooms, baskets, arrows, pipes, bedding, brush handles, knives, and mats, among other tools,  
293 or into parts of the house, such as in roof thatching. For example, North American Thompson  
294 River Indians imbricate stems of *L. cinereus* into baskets (Turner 1996), and *E. arenarius* L. is  
295 formed into in ropes and brooms in parts of Eurasia (Hooker 1839). We found that roots, stems,  
296 leaves, and culms of *Elymus* are all employed in material ways.

297

### 298 *Floret area measurements*

299 Floret area was measured for 21 *Elymus* species with documented use histories (see  
300 above). Floret area varies significantly across *Elymus* species ( $F_{20} = 13.37$ ,  $P < 0.0001$ ), as well  
301 as among individuals within species ( $F_{21} = 10.60$ ,  $P < 0.0001$ ). Using species’ means, we fit  
302 linear models to assess if average floret area differed by location (i.e. North America vs. Eurasia)

303 and within each of the four ethnobotanical categories (i.e. documented use vs. unspecified)  
304 (Table 2). For medicine, floret area does not differ by region ( $F_1 = 3.63$ ,  $P > 0.05$ ; Figure 2).  
305 However, average floret area is significantly greater for species with medicinal uses compared to  
306 species without documented medicinal uses in North America ( $F_1 = 4.75$ ,  $P = 0.03$ ; Figure 2a).  
307 In contrast, for food, forage, and material categories, floret area does not differ significantly by  
308 region (Food:  $F_1 = 4.01$ ,  $P > 0.05$ ; Forage:  $F_1 = 3.93$ ,  $P > 0.05$ ; Material:  $F_1 = 3.87$ ,  $P > 0.05$ ).  
309 Additionally, no differences in floret area are observed when we compare average floret area for  
310 species used for food, forage, and material to those without documented usage in each category,  
311 (Food:  $F_1 = 2.33$ ,  $P > 0.05$ ; Forage:  $F_1 = 1.71$ ,  $P > 0.05$ ; Material;  $F_1 = 1.24$ ,  $P > 0.05$ ). In  
312 summary, average floret area does not differ significantly across geographic regions and among  
313 documented ethnobotanical uses, with the exception of species used for medicine in North  
314 America. Florets of species used medicinally were larger than florets of species not used  
315 medicinally in this region.



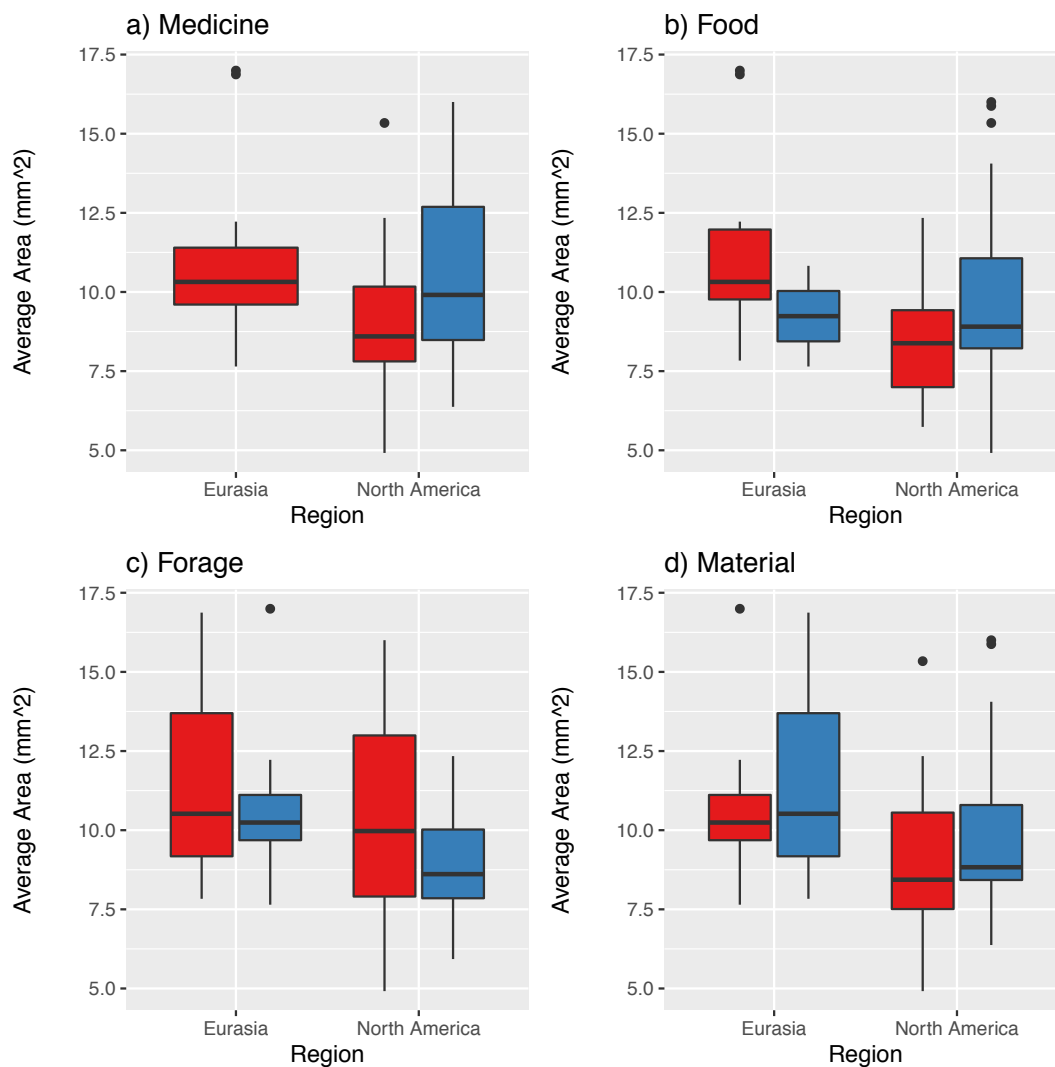

316

317 **Figure 2.** Comparison of average floret area by use (medicine, food, forage, and material) and  
318 region (North America, Eurasia). Blue denotes a documented use within that ethnobotanical  
319 category. Red denotes no documented use within that ethnobotanical category. Significant  
320 differences ( $F_1 = 4.75$ ,  $P = 0.03$ ) found only for medicinal uses in North America (2a).

321

322 To further investigate drivers of variation in average floret area across specimens, we  
323 tested for associations between average floret area, latitude, and longitude within region (i.e.  
324 North America vs. Eurasia). In North America, average floret area increases from east to west ( $t$

325 = -2.41,  $P = 0.02$ ), but is not variable across latitudes ( $t = 1.52$ ,  $P = 0.14$ ). In Eurasia, there is no  
326 significant relationship between average floret area and latitude ( $t = 0.20$ ,  $P = 0.85$ ) or longitude  
327 ( $t = 0.17$ ,  $P = 0.87$ ); however, this may be an artifact of lower sampling in Eurasia in this study.

328

## 329 **Discussion**

330 Growing concerns about ecological impacts of agricultural systems based on annual  
331 plants has turned attention to the potential of perennial, herbaceous species in contemporary food  
332 systems. Through their large, persistent root systems, among other traits, perennial, herbaceous  
333 plants offer ecological services including reduced erosion and increased absorption of water.  
334 However, because of a dearth of herbaceous perennial crops, identifying potential candidates for  
335 the ecological intensification of agriculture remains a challenge (Bommarco 2013).  
336 Ethnobotanical records play an important role in this process by providing practical information  
337 about wild plant use and morphology. *Elymus* is a genus of interest for pre-breeding and  
338 domestication processes because of its rich ethnobotanical record, documented edibility, and  
339 reproductive morphology. In addition, its history of hybridization suggests that members of the  
340 genus may be intercrossed to develop new agricultural cultivars with beneficial trait  
341 combinations. While there is no indication that native users of this group selected species with  
342 larger floret areas for consumption, forage, or as material, significant variation in floret area  
343 exists among and within species. Grain morphology is a valuable target of selection for  
344 domestication in perennial grasses, and standing phenotypic variation in this group could serve  
345 as a foundation for future breeding initiatives. Moreover, variation in use of *Elymus* species  
346 illuminates the potential for broad application of this genus.

347

348 ***Ethnobotanical analyses as a foundation for agricultural innovation***

349 Ethnobotanical records are a vital source of information on plant diversity, use,  
350 distribution, form, and function. In particular, ethnobotanical records can inform agricultural  
351 processes by examining how plants have been manipulated or altered for human use (Casas et al.  
352 1996). Further, these studies document which species were chosen for economic and cultural  
353 purposes (Ford 2000). Additionally, ethnobotanical resources provide insight on geographic  
354 distributions, environmental tolerances, toxicities, preparation methods, and human preferences  
355 for certain features (flavors, shapes, textures, colors, etc.) of wild food plants (Casas et al. 1996).  
356 These records thereby help identify species with agricultural potential, and provide pertinent  
357 information on plant morphology and edibility in an agricultural context (Ciotir et al. 2019;  
358 Minnis 2000; Plucknett and Smith 1986).

359 Our dataset identified 21 species of *Elymus* with known food, forage, medicine, and  
360 material uses globally, and attributed these uses to at least 25 different indigenous communities.  
361 The most frequent use of *Elymus* is as forage or fodder, further highlighting perennial members  
362 of Triticeae as globally important sources of forage grass (Kole 2011). We identified ten species  
363 of *Elymus* that are used for food (*E. canadensis*, *E. elymoides*, *E. glaucus*, *E. mollis*, *E.*  
364 *multisetus*, *E. repens*, *E. sibiricus*, *L. cinerius*, *L. condensatus* and *L. triticoides*). Of these, the  
365 seed is most frequently consumed, though in two instances (e.g. *E. repens* and *L. condensatus*)  
366 there are food uses for the entire plant, including the roots and rhizomes (Table 2). The  
367 preparation methods for seed are straightforward (i.e. ground and mixed with water as a mash, or  
368 finely pounded into flour), suggesting that their edibility is not contingent on rigorous  
369 processing. Further, food products prepared with *Elymus* are similar to many modern grain  
370 products, and include bread, flour, and cereal. We suggest further investigation of these ten

371 species for their potential contribution to the ecological intensification of agriculture. Lastly, the  
372 documentation of medicinal and material uses suggests that *Elymus* taxa are multifunctional, and  
373 perhaps the whole plant can be employed post-production or at the end of their lifespan (i.e. as  
374 hay for livestock or in thatching).

375 A previous ethnobotanical study of annual and perennial wild grass genera substantiated  
376 their importance as a food source for Native American communities, including species from  
377 *Oryzopsis*, *Sporobolus*, and *Panicum* and highlighted their potential to elucidate cereal  
378 domestication processes (Doebley 1984). Similarly, ethnobotanical studies of other wild foods  
379 have resulted in recommendations for their agricultural improvement, such as in grain chenopods  
380 (Partap and Kapoor 1985). Other studies suggest improved collections of wild plants to  
381 encourage their cultivation, such as in wild onion (*Allium*) (Bye 1985). Thus, in addition to  
382 identifying potential crops, ethnobotanical studies can result in a variety of suggestions for pre-  
383 breeding and domestication efforts in wild food plants.

384 *Elymus* is a cosmopolitan genus, and the 21 species in this study with documented  
385 ethnobotanical uses have widely distributed native ranges, occurring across temperate North  
386 America and Eurasia. While we identified documented uses for *Elymus* in several Eurasian  
387 countries (Table 1), the depth of ethnobotanical information about *Elymus* species used in North  
388 America was much greater. This disparity could be accredited to the fact that we primarily used  
389 resources at the Missouri Botanical Garden library, thereby biasing the details of our study to  
390 North America and to resources in English. As such, there are other globally-distributed *Elymus*  
391 species that could have been used in an ethnobotanical capacity and that may also have potential  
392 for use in pre-breeding and domestication programs. For example, wild relatives of sunflower  
393 (Heliantheae) with larger ranges may have environmental tolerances and other traits useful to

394 breeding initiatives (Kantar et al. 2015).

395

396 ***Variation in floret traits of Elymus species***

397 Seed traits (floret traits in *Elymus*) are an important feature of wild and domesticated  
398 plants that may bear some indication of other agronomically and ecologically important features.  
399 For example, wild taxa with larger seeds can have larger seedlings, faster rates of germination,  
400 higher recruitment success, and greater reproductive output, though trade-offs in seed size and  
401 seed number exist for some species (Giles 1990; Jakobsson and Eriksson 2000). Similarly,  
402 during grain domestication, selection favors species and individuals with larger seeds, resulting  
403 in greater seedling vigor, root and shoot biomass, and yield, though the correlation of seed size to  
404 plant size at maturity is weaker (Milla and Matesanz 2017; Preece et al. 2015; Rees and Venable  
405 2007; Stougaard and Xue 2004). Further, it has been found that the progenitors of cereal crops  
406 have larger seeds than other wild grasses that have never undergone domestication (Preece et al.  
407 2015). Given this information, we hypothesized that *Elymus* species with larger floret areas  
408 would perhaps be more frequently used as a food source and be more desirable for human  
409 consumption/domestication purposes. For the *Elymus* taxa examined in this study, we found  
410 significant differences in floret area between species and among replicates of a species. This  
411 suggests that there is substantial natural variation in floret area within *Elymus*, an economically  
412 and agriculturally important trait with potential for selection and evolution through the pre-  
413 breeding process. From a conservation perspective, these data underscore the importance of a  
414 dynamic *in situ* and *ex situ* conservation management that targets multiple species within a  
415 genus, and diverse populations in different geographic locations (e.g., Khoury et al. 2019).

416 We observed a significant relationship between floret area and medicinal use in North

417 American *Elymus* species. We cannot ensure that the specimens measured accurately reflect the  
418 plants used by indigenous communities in the last three centuries. However, some studies  
419 exploring seeds traits of medicinal plants assess seed size in relation to oil content (i.e. *Moringa*,  
420 Mani et al. 2007; *Pentaclethra*, Asoegwu et al. 2006). The medicinal uses of vegetative plant  
421 parts (i.e. roots) of *Elymus* exist, yet seeds were rarely described in a medicinal context (Table  
422 2); therefore, the benefit of a larger floret area for medicinal applications should be further  
423 investigated. For example, what properties of *Elymus* grains matter in medicinal applications  
424 (oils, carbohydrates)? Are the grains ground, infused, or eaten directly in a medicinal context?  
425 Future work could use voucher specimens from ethnobotanical studies to track the relationship  
426 between medicinal use and floret area. Further, this study and others like it emphasize the  
427 importance of plant use histories in conservation management, as different cultural communities  
428 have unique and varied uses for the same species or closely related species; or, they have used  
429 different species for similar purposes (e.g., Albuquerque et al. 2009)

430         Despite the wide variation in floret size within and among *Elymus* species, we did not  
431 observe a significant relationship between average floret area, region, and documented  
432 ethnobotanical use for the remaining three categories examined here (food, forage, and material).  
433 It is conceivable that use of *Elymus* species for forage and material would not necessarily lead to  
434 changes in seed size, as the primary structures being used (e.g., stems, leaves) may have been the  
435 targets of selection. Data for these components of the plant were not collected in this study;  
436 consequently, we are unable to assess whether or not forage and material uses led to changes in  
437 these traits. Regarding food uses, archaeological analyses of taxa previously used for food have  
438 demonstrated differences in seed size and other traits over time (Langlie et al. 2014; Mueller  
439 2017), providing evidence for selection and domestication. The lack of association between

440 floret size and use of *Elymus* for food in our dataset indicates that floret area was not associated  
441 with utilization or consumption by indigenous communities. Detailed analyses of other traits,  
442 including inflorescence size, plant height, historical abundance, may provide insights into  
443 selection during at their time of use. Nonetheless, nearly all of the collections sampled in this  
444 study were from the 20th century, and floret areas may have varied more significantly at the time  
445 and place of use. Further, comparative analyses of the *Elymus* species with documented use  
446 histories with other *Elymus* species for which no use history is known, might shed light on how  
447 floret traits in *Elymus* species have changed through their interaction with humans. Floret and  
448 grain traits remain important for *de novo* domestication in grasses and should be examined more  
449 extensively in *Elymus* as well as other taxa of interest.

450  
451 **Conclusions**  
452

453 Morphological and genetic variation in cultivated plants, their wild progenitors, and other  
454 wild species provides the foundation for plant domestication and breeding efforts. In response to  
455 concerns about long-term sustainability of our current agricultural system, attention is focusing  
456 in part on *de novo* domestication of wild species (Ciotir et al. 2016; Ciotir et al. 2019; Kole  
457 2011). As such, *Elymus* and many other genera of herbaceous perennials, merits increased  
458 attention to its research, development, and conservation. These efforts include improving the  
459 availability of *Elymus* germplasm in biorepositories globally in conjunction with expanding the  
460 collection of ethnobotanical histories throughout the genus. Additionally, we suggest more  
461 comprehensive morphological and molecular studies of taxa with documented food uses to more  
462 precisely identify promising candidates for agriculture. Similarly, we see value in *in-situ*  
463 conservation for genetically, phenotypically, and culturally valuable populations (i.e. at sites of  
464 indigenous use), as well as in-ground plantings to assess survivability in a controlled

465 environment. Ultimately, a variety of *Elymus* species show promise for the ecological  
466 intensification of agriculture.

467

#### 468 **Acknowledgements**

469 This research was supported by The Perennial Agriculture Project in conjunction with the  
470 Malone Family Land Preservation Foundation and The Land Institute, the Missouri Botanical  
471 Garden, and Saint Louis University. The authors are grateful to Dr. James Solomon and Dr.  
472 Gerrit Davidse for their help in the Missouri Botanical Garden herbarium. We thank Dr. Laura  
473 Klein and Zachary Harris for valuable comments on the manuscript.

474

#### 475 **Author Contributions**

476 AJM, BM, CC, ESF, and MJR conceived of the study. BM, CC, and ESF collected the data. ESF  
477 and MJR performed data analyses. AJM, BM, and ESF took the lead in writing the manuscript  
478 and all authors contributed to manuscript editing.

479

#### 480 **References**

481 Albuquerque, U.P., Sousa Araújo, T.A., Ramos, M.A., Teixeira do Nascimento, V., Lucena,  
482 R.F.P., Monteiro, J.M., Alencar, N.L., E. Lima Araújo. 2009. How Ethnobotany Can Aid  
483 Biodiversity Conservation: Reflections on Investigations in the Semi-Arid Region of NE Brazil.  
484 Biodiversity and Conservation 18(1): 127–50. <https://doi.org/10.1007/s10531-008-9463-8>.

485

486 Asoegwu, S., Ohanyere, S., Kanu, O.P., C.N. Iwueke. 2006. Physical Properties of African Oil  
487 Bean Seed (*Pentaclethra macrophylla*). Agricultural Engineering International: the CIGR



488 Ejournal. Manuscript FP 05006. Vol. VIII.

489

490 Aubry, C., Shoal, R., V. Erickson. 2005. Grass cultivars: their origins, development, and use on  
491 national forests and grasslands in the Pacific Northwest. Pendleton (OR): USDA Forest Service,  
492 Umatilla National Forest. Available at:

493 [https://www.fs.fed.us/wildflowers/Native\\_Plant\\_Materials/documents/cultivars\\_maindoc\\_04040](https://www.fs.fed.us/wildflowers/Native_Plant_Materials/documents/cultivars_maindoc_040405_appendices.pdf)  
494 [5\\_appendices.pdf](https://www.fs.fed.us/wildflowers/Native_Plant_Materials/documents/cultivars_maindoc_040405_appendices.pdf)

495

496 Austin, D. F. 2004. Florida Ethnobotany. Boca Raton, FL: CRC.

497

498 Awika, J.M. 2011. Major Cereal Grains Production and Use around the World. Advances in  
499 Cereal Science.

500

501 Barkworth, M.E. 2007. Triticeae. In: Flora of North America Magnoliophyta: Commelinidae (in  
502 part): Poaceae, Part 1: North of Mexico. Vol 24, pp. 239-374. Oxford, Oxford University Press.

503

504 Bean, L. J., K.S. Saubel. 1972. Temalpakh: Cahuilla Indian knowledge and usage of plants.

505 Banning: Malki Museum.

506

507 Bommarco, R., Kleijn, D., S.G. Potts. 2013. Review: Ecological intensification: harnessing  
508 ecosystem services for food security. Trends in Ecology & Evolution, 28(4): 230-238.

509 [https://doi: 10.1016/j.tree.2012.10.012](https://doi.org/10.1016/j.tree.2012.10.012).

510 Bye, R. A. 1985. Botanical perspectives of ethnobotany of the Greater Southwest. Economic

- 511 Botany: 39(4), 375–386. doi:10.1007/bf02858744
- 512 Casas, A., del Carmen Vázquez, M., Viveros, J.L., J. Caballero. 1996. Plant Management  
513 Among the Nahua and the Mixtec in the Balsas River Basin, Mexico: An Ethnobotanical  
514 Approach to the Study of Plant Domestication. *Human Ecology*, 24(4): 455-478.
- 515 Cassman, K.G. 1999. Ecological intensification of cereal production systems: Yield potential,  
516 soil quality, and precision agriculture. *Proceedings National Academy of Sciences*, 96(11): 5952-  
517 5959. <https://doi.org/10.1073/pnas.96.11.5952>.
- 518 Chamberlin, L.V. 1911. The ethnobotany of the Gosiute Indians. *Academy of Natural Sciences*,  
519 61(1): 24-99.
- 520
- 521 Chen, S., G., Zhu. 2006. Poaceae (Tribe Triticeae). Wu Z.Y. and Raven P.H. (eds.). *Flora of*  
522 *China*, Vol. 22, Poaceae. 386-663. Science Press, Beijing, and Missouri Botanical Garden Press,  
523 St. Louis.
- 524 Ciotir, C., Applequist, W., Crews, T.E., Cristea, N., DeHaan, L.R., Frawley, E., Herron, S.,  
525 Magill, R., Miller, J., Roskov, Y., Schlautman, B., Solomon, J., Townesmith, A., Van Tassel, D.,  
526 Zarucchi, J., A.J. Miller. 2019. Building a botanical foundation for perennial agriculture: Global  
527 inventory of wild, perennial herbaceous Fabaceae species. *Plants, People, Planet*, 00: 1-12.  
528 <https://doi.org/10.1002/ppp3.37>
- 529 Clayton, W.D., Vorontsova, M.S., Harman, K.T., H. Williamson. 2006 onwards. GrassBase -  
530 The Online World Grass Flora. <http://www.kew.org/data/grasses-db.html>
- 531

- 532 Couplan, F. 1998. The Encyclopedia of Edible Plants of North America. Keats Publishing.  
533
- 534 Cox, T.S., Bender, M., Picone, C., Van Tassel, D.L., Holland, J.B., Brummer, E.C., Zoeller,  
535 B.E., Paterson, A.H., W. Jackson. 2002. Breeding perennial grain crops. Critical Reviews in  
536 Plant Sciences, 21(2): 59-91.  
537
- 538 Cox, T.S., Glover, J.D., Van Tassel, D.L., Cox, C.M., L.R. DeHaan. 2006. Prospects for  
539 developing perennial grain crops. BioScience, 56(8): 649-659.  
540
- 541 Cox, T.S. 2009. Chapter 1: Crop domestication and the first plant breeders. Pp 1-26 *in* S.  
542 Ceccarelli; E.P. Guimar; E. Weltzien (eds.), Plant breeding and farmer participation. U.N. Food  
543 and Agriculture Organization.  
544
- 545 Cox, S., Nabukalu, P., Paterson, A. Kong, W., S. Nakasagga. 2018. Development of Perennial  
546 Grain Sorghum. Sustainability, 10(1): 172-180. <https://doi.org/10.3390/su10010172>.
- 547 Doebley, J. F. 1984. “Seeds” of wild grasses: A major food of Southwestern Indians. Economic  
548 Botany, 38(1): 52–64.[doi:10.1007/bf02904415](https://doi.org/10.1007/bf02904415)
- 549 Doré, T., Makowski, D., Malézieux, E., Munier-Jolain, N., Tchamitchian, M., P. Tittoneil. 2011.  
550 Facing up to the paradigm of ecological intensification in agronomy: Revisiting methods,  
551 concepts and knowledge. European Journal of Agronomy, 34: 197–210.  
552 <https://doi.org/10.1016/j.eja.2011.02.006>.
- 553 DeHaan, L.R., Christians, M., Crain, J. Poland. 2018. Development and Evolution of an

- 554 Intermediate Wheatgrass Domestication Program. *Sustainability*, 10(5): 1499.
- 555 <https://doi.org/10.3390/su10051499>
- 556 DeHaan, L. R., D. L. Van Tassel, J. A. Anderson, S. R. Asselin, R. Barnes, G. J. Baute, D. J.
- 557 Cattani, S. W. Culman, K. M. Dorn, B. S. Hulke, M. Kantar, S. Larson, M. D. Marks, A. J.
- 558 Miller, J. Poland, D. A. Ravetta, E. Rude, M. R. Ryan, D. Wyse, X. Zhang. 2016. A Pipeline
- 559 Strategy for Grain Crop Domestication. *Crop Science*, 56: 917-930.
- 560 doi:10.2135/cropsci2015.06.0356
- 561 DeHaan, L.R., D.L. Van Tassel. 2014. Useful insights from evolutionary biology for developing
- 562 perennial grain crops. *American Journal of Botany*, 101(10): 1801-1819.
- 563
- 564 DeHaan, L. R., Van Tassel D. L., T.S. Cox. 2010. Missing domesticated plant forms: can
- 565 artificial selection fill the gap? *Evolutionary Applications*, 3(5-6): 434-452.
- 566 doi: [10.1111/j.1752-4571.2010.00132.x](https://doi.org/10.1111/j.1752-4571.2010.00132.x)
- 567 Ebeling, W. 1986. *Handbook of Indian foods and fibers of arid America*. Berkeley u.a.: Univ. of
- 568 Calif. Pr.
- 569
- 570 Elliot, B.A. 2009. *Handbook of edible and poisonous plants of western North America*. Elliot
- 571 Environmental Consulting, LLC.
- 572
- 573 Facciola. S. 1990. *Cornucopia: A Source Book of Edible Plants*. California: Kampong
- 574 Publications.
- 575
- 576 Fatih, A.M.B. 1983. Analysis of the breeding potential of wheat-Agropyron and wheat-Elymus

577 derivatives. *Hereditus*, 98: 287-295.

578

579 Ferrier, J., Saciragic, L., Trakic, S., Chen, E.C.H., Gendron, R.L., Cuerrier, A., Balick, M.J.,

580 Redzic, S., Alikadic, E., J.T. Arnason. 2015. An ethnobotany of the Lukomir Highlanders of

581 Bosnia & Herzegovina. *Journal of Ethnobiology and Ethnomedicine*, 11: 81.

582

583 Food and Agriculture Organization of the United Nations (FAO). 2009. A Global Treaty for

584 Food Security and Sustainable Agriculture, International Treaty on plant genetic resources for

585 food and agriculture. FAO, Rome: Electronic Publishing Policy and Support Branch

586 Communication Division.

587

588 Food and Agriculture Organization of the United Nations (FAO). 2019. The State of the World's

589 Biodiversity for Food and Agriculture, J. Bélanger & D. Pilling (eds.). FAO Commission on

590 Genetic Resources for Food and Agriculture Assessments. Rome.

591 (<http://www.fao.org/3/CA3129EN/CA3129EN.pdf>)

592 Licence: CC BY-NC-SA 3.0 IGO.

593

594 Ford, R.I. 2000. Agriculture: An Introduction. in Minnis, P.E. (ed.) *Ethnobotany: A Reader*.

595 University of Oklahoma Press, Norman. Pp. 243.

596

597 Füleky, G. (ed.) 2009. Cultivated Plants, Primarily As Food Sources. Eolss Publishers Co. Ltd.

598 Oxford, United Kingdom.

599

600 Gegas, V.C., Nazari, A., Griffiths, S., Simmonds, J., Fish, L., Orford, S., Sayers, L., Doonan,  
601 J.H., J.W. Snape. 2010. A genetic framework for grain size and shape variation in wheat. *Plant*  
602 *Cell*, 22(4): 1046-55. doi: 10.1105/tpc.110.074153.  
603  
604 Giles, B.E. 1990. The effects of variation in seed size on growth and reproduction in the wild  
605 barley *Hordeum vulgare* ssp. *Spontaneum*. *Heredity* 64: 239-250.  
606  
607 Gregg, B.R., G.L. Billups. 2010. *Seed Conditioning, Volume 3: Crop Seed Conditioning*. CRC  
608 Press. ISBN: 1439846715.  
609  
610 Glémin, S., T. Bataillon. 2009. A comparative view of the evolution of grasses under  
611 domestication. *New Phytologist*, 183: 273–290.  
612  
613 Glover, J. D., J. P. Reganold, L. W. Bell, J. Borevitz, E. C. Brummer, E. S. Buckler, C. M. Cox,  
614 et al. 2010. “Increased Food and Ecosystem Security via Perennial Grains.” *Science* 328 (5986):  
615 1638–39. <https://doi.org/10.1126/science.1188761>.  
616  
617 Hanelt, P. 2001. *Mansfeld's Encyclopedia of Agricultural and Horticultural Crops*, vol. 5. New  
618 York, Berlin: Springer.  
619  
620 Harlan J., de Wet J., E. Price. 1973. Comparative evolution of cereals. *Evolution*, 27: 311–325.  
621 DOI: 10.1111/j.1558-5646.1973.tb00676.x.  
622

- 623 Harlan, J.R. 1992. Crops and Man, 2nd Edition. American Society of Agronomy and Crop  
624 Science Society of America, Madison, WI.  
625
- 626 Hayes, R.C., Wang, S., Newell, M.T., Turner, K., Larsen, J., Gazza, L., Anderson, J.A., Bell,  
627 L.W., Cattani, D.J., Frels, K., Galassi, E., Morgounov, A.I., Revell, C.K., Thapa, D.B., Sacks,  
628 E.J., Sameri, M., Wade, L.J., Westerbergh, A., Shamanin, V., Amanov, A., G.D. Li. 2018. The  
629 performance of early-generation perennial winter cereals at 21 sites across four continents.  
630 Sustainability, 10(4):1124-1152. <https://doi.org/10.3390/su10041124>.  
631
- 632 Helfgott, D.E, R.J. Mason-Gamer. 2004. The evolution of North America *Elymus* (Triticeae,  
633 Poaceae) allotetraploids: evidence from phosphoenolpyruvate carboxylase gene sequences.  
634 Systematic Botany, 29(4): 850-861.  
635
- 636 Hooker, W.D. 1839. Notes on Norway; or a brief journal of a tour made to the Northern parts of  
637 Norway, in the summer of MDCCCXXXVI.  
638
- 639 Huang, G., Qin, S., Zhang, S., Cai, X., Wu, S., Dao, J., Zhang, J., Huang, L., Harnpichitvitaya,  
640 D., Wade, L., F. Hu. 2018. Performance, economics and potential impact of perennial rice PR23  
641 relative to annual rice cultivars at multiple locations in Yunnan Province of China.  
642 Sustainability, 10(4): 1086-1104. <https://doi.org/10.3390/su10041086>.  
643
- 644 Jakobsson, A., O. Eriksson. 2000. A comparative study of seed number, seed size, seedling size  
645 and recruitment in grassland plants. Oikos, 88(3): 494–502. doi:10.1034/j.1600-

646 0706.2000.880304.x

647

648 Johnston, A. 1970. Blackfoot Indian utilization of the flora of the northwestern Great Plains.

649 *Economic Botany*, 24(3): 301-324.

650

651 Kantar, M. B., Sosa, C.C., Khoury, C.K., Castañeda-Álvarez, N.P., Achicanoy, H.A., Bernau, V.

652 Kane, N.C., Marek, L., Seiler, G., L. H. Rieseberg. 2015. Ecogeography and Utility to Plant

653 Breeding of the Crop Wild Relatives of Sunflower (*Helianthus Annuus* L.). *Frontiers in Plant*

654 *Science* 6: 841. <https://doi.org/10.3389/fpls.2015.00841>.

655

656 Kellogg, E.A. 2015. *The Families and Genera of Vascular Plants: Flowering Plants, Monocots,*

657 *Poaceae*. Switzerland, Springer International Publishing.

658

659 Khoury, C. K., Amariles, D., Soto, J.S., Diaz, M.V., Sotelo, S., Sosa, C.C., Ramírez-Villegas, J.,

660 et al. 2019. Comprehensiveness of Conservation of Useful Wild Plants: An Operational Indicator

661 for Biodiversity and Sustainable Development Targets. *Ecological Indicators* 98: 420–29.

662 <https://doi.org/10.1016/j.ecolind.2018.11.016>

663

664 Khoury, C.K., Bjorkman, A.D., Dempewolf, H., Ramirez-Villegas, J., Guarino, L., Jarvis, A.,

665 Rieseberg, L.H., P.C. Struik. 2014. Increasing homogeneity in global food supplies.

666 *Proceedings of the National Academy of Sciences*, 111(11): 4001-4006.

667 DOI:10.1073/pnas.1313490111.

668



- 669 Kole, C. 2011. Wild crop relatives: genomic and breeding resources; cereals. Berlin Heidelberg,  
670 Springer-Verlag.  
671
- 672 Kunkel, G. 1984. Plants for human consumption: An Annotated Checklist of the Edible  
673 Phanerogams and Ferns. Koeltz Scientific Books, Koenigstein.  
674
- 675 Langlie, B.S., Mueller, N.G., Spengler, R.N., G.J. Fritz. 2014. Agricultural Origins From the  
676 Ground Up: Archaeological Approaches to Plant Domestication. American Journal of Botany  
677 101(10): 1601-1617.  
678
- 679 Lantis, M. 1946. The social culture of the Nunivak Eskimo. Transactions of the American  
680 Philosophical Society, 35(3): 153-323.  
681
- 682 Lloyd-Reilley, J. 2010. Plant guide for Canada wildrye (*Elymus canadensis*). USDA-Natural  
683 Resources Conservation Service, E. “Kika” de la Garza Plant Materials Center. Kingsville, TX.  
684 Available at: [https://plants.usda.gov/plantguide/pdf/pg\\_elca4.pdf](https://plants.usda.gov/plantguide/pdf/pg_elca4.pdf) [accessed June 21, 2019].  
685
- 686 Lu, B.R. 1993. Biosystematic investigations of asiatic wheatgrasses-*Elymus* L. (*Triticeae*:  
687 *Poaceae*). The Swedish University of Agricultural Sciences.  
688
- 689 MacKinnon et al. 2009. Edible & medicinal plants of Canada. Lone Pine Publishing.  
690
- 691 Mani, S., Jaya, S., R. Vadivambal. 2007. Optimization of Solvent Extraction of Moringa

- 692 (*Moringa Oleifera*) Seed Kernel Oil Using Response Surface Methodology. Food and  
693 Bioproducts Processing 85(4): 328-335. <https://doi.org/10.1205/fbp07075>  
694  
695 Mueller, N.G. 2017. Veget Hist Archaeobot 26: 313. <https://doi.org/10.1007/s00334-016-0592-9>  
696  
697 Milla, R., S. Matesanz. 2017. Growing larger with domestication: a matter of physiology,  
698 morphology or allocation? Plant Biology, 19(3), 475–483. doi:10.1111/plb.12545  
699  
700 Miller, A.J., Novy, A., Glover, J., Kellogg, E.A., Maul, J.E., Raven, P., P. Wyse Jackson. 2015.  
701 Expanding the role of botanical gardens in the future of food. Nature Plants, 1(15078): doi:  
702 10.1038/nplants.2015.78.  
703  
704 Millet, E. 1986. Relationships Between Grain Weight and the Size of Floret Cavity in the Wheat  
705 Spike. Annals of Botany, 58(3): 417-423. <http://www.jstor.org/stable/42757682>  
706  
707 Millet, E., M.J. Pinthus. 1984. The association between grain volume and grain weight in wheat.  
708 Cereal Science, 2(1): 31-35. [https://doi.org/10.1016/S0733-5210\(84\)80005-3](https://doi.org/10.1016/S0733-5210(84)80005-3)  
709  
710 Minnis, P.E. 2000. Ethnobotany: A Reader. University of Oklahoma Press, Norman.  
711  
712 Moerman, D. E. 1998. Native American ethnobotany. Timber Press, Portland.  
713  
714 National Geographic Society (NGS). 2008. Edible: an illustrated guide to the world's food

715 plants. National Geographic Society, Washington D.C.

716

717 Okamoto, Y., Kajimura, T., Ikeda, T.M., S. Takumi. 2012. Evidence from principal component  
718 analysis for improvement of grain shape and spikelet morphology related traits after hexaploid  
719 wheat speciation. *Genes Genet Syst*, 87(5): 299-310.

720

721 Olsen, K.M., J.F. Wendel. 2013a. Crop plants as models for understanding plant adaptation and  
722 diversification. *Frontiers in Plant Science*, 1(4): 290. doi: 10.3389/fpls.2013.00290.

723

724 Olsen, K.M., J.F. Wendel. 2013b. A bountiful harvest: genomic insights into crop domestication  
725 phenotypes. *Annual Reviews in Plant Biology*, 64: 47-70. Doi: 10.1146/annurev-arplant-050312-  
726 120048.

727

728 Partap, T., P. Kapoor. 1985. The Himalayan Grain Chenopods: Distribution and Ethnobotany.  
729 *Agriculture, Ecosystems, and Environment*, 14(3-4): 185-199. [https://doi.org/10.1016/0167-](https://doi.org/10.1016/0167-8809(85)90035-0)  
730 [8809\(85\)90035-0](https://doi.org/10.1016/0167-8809(85)90035-0)

731

732 Plucknett, D.L., N.J.H. Smith. 1986. International prospects for cooperation in crop research.  
733 *Economic Botany*, 40(3): 298–309. doi:10.1007/bf02858987

734

735 Preece, C., Livarda, A., Wallace, M., Martin, G., Charles, M., Christin, P.A., Jones, G., Rees, M.,  
736 C.P. Osborne. 2015. Were Fertile Crescent crop progenitors higher yielding than other wild  
737 species that were never domesticated? *New Phytologist*, 207(3): 905-913.

738

739 Rees M., D.L. Venable. 2007. Why do big plants make big seeds? *Journal of Ecology* 95: 926–  
740 936.

741

742 RStudio Team. 2015. RStudio: Integrated Development for R. RStudio, Inc., Boston, MA.  
743 <http://www.rstudio.com/>.

744

745 Sargin, S.A., Akçicek, E., S. Selvi. 2013. An ethnobotanical study of the medicinal plants used  
746 by the local people of Alasehir (Manisa) in Turkey. *Journal of Ethnopharmacology*, 150(3): 860-  
747 874.

748

749 SAS Institute, Base SAS 9.4 Procedures Guide: Statistical Procedures, Fifth Edition. SAS  
750 Institute, 2017.

751

752 Schenck, S.M., E. W. Gifford. 1952. Karok Ethnobotany. *Anthropological Records*, 13(6): 377-  
753 392.

754

755 Smith, H. 1997. Ethnobotany of the Gitksan Indians of British Columbia. *Canadian Museum of*  
756 *Civilization*.

757

758 Smith Jr., J. P. 2014. *Field guide to grasses of California*. University of California Press.

759

760 St. John, L., Jensen, K., Ogle, D.G., D. Tilley. 2010. *Plant guide for RS Hybrid wheatgrass*

- 761 (*Elymus hoffmannii*). USDA-Natural Resources Conservation Service, Aberdeen, ID Plant  
762 Materials Center and USDA-ARS Forage and Range Laboratory, Logan, UT. Available at:  
763 [https://plants.usda.gov/plantguide/pdf/pg\\_elho3.pdf](https://plants.usda.gov/plantguide/pdf/pg_elho3.pdf)  
764
- 765 Stougaard, R.N., Q.W. Xue. 2004. Spring wheat seed size and seeding rate effects on yield loss  
766 due to wild oat (*Avena fatua*) interference. *Weed Science*, 52: 133–141.  
767
- 768 Tanaka, T. 1976. Tanaka's cyclopaedia of edible plants of the world. Keigaku Publishing.  
769
- 770 Tilley, D., Ogle, D., L. St. John. 2011. Plant guide for slender wheatgrass (*Elymus trachycaulus*  
771 ssp. *trachycaulus*). USDA-Natural Resources Conservation Service, Idaho Plant Materials  
772 Center. Aberdeen, ID. [https://plants.usda.gov/plantguide/pdf/pg\\_eltr7.pdf](https://plants.usda.gov/plantguide/pdf/pg_eltr7.pdf)  
773
- 774 Timbrook, J. 1984. Chumash Ethnobotany: A preliminary report. *Journal of Ethnobiology*, 4(2):  
775 141-169.
- 776 Tittonell, P. 2014. Ecological intensification of agriculture — sustainable by nature. *Current*  
777 *Opinion in Environmental Sustainability*, 8: 53-61. <https://doi.org/10.1016/j.cosust.2014.08.006>
- 778 Turner, N.J. 2010. *Plants of Haida Gwaii*. Winlaw, B.C.: Sono Nis Press.  
779
- 780 Turner, N.J., Thomas, J., Carlson, B.F., R.T. Ogilvie. 1983. *Ethnobotany of the Nitinaht Indians*  
781 *of Vancouver Island*. Victoria: Ministry of Provincial Secretary and Government Services,  
782 Province of British Columbia.  
783

- 784 Turner, N.J., Thompson, L.C., Thompson, M.T., A.Z. York. 1996. Thompson ethnobotany:  
785 knowledge and usage of plants by the Thompson Indians of British Columbia. Victoria, B.C:  
786 Royal British Columbia Museum.  
787
- 788 Wang, S.L., Qi, L.L., Chen, P.D., Liu, D.J., Friebe, B., B.S. Gill. 1999. Molecular cytogenetic  
789 identification of wheat-Elymus tsukushiense introgression lines. *Euphytica*, 107: 217-224.  
790
- 791 Warren, J. 2015. The nature of crops: how we came to eat the plants we do. Wallingford: CABI.  
792 1780645082.  
793
- 794 Waugh, F.W. 1916. Iroquois Foods and Food Preparation. University Press of the Pacific. ISBN  
795 1410207765.  
796
- 797 Welch, J.R. 2013. Sprouting valley historical ethnobotany of the northern pomo from Potter  
798 Valley, California. Denton, TX: Society of Ethnobiology.  
799
- 800 Yanovsky, E. 1936. Food plants of the North American Indians. Publication no. 237. U.S. Dept  
801 of Agriculture.  
802
- 803 Zigmond, M.L.1981. Kawaiisu Ethnobotany. Salt Lake City: Univ. of Utah Press.  
804
- 805 Zohary, D., Hopf, M. E. Weiss (eds.). 2012. Domestication of Plants in the Old World. 4th  
806 edition. New York: Oxford University Press.

807

808

809

810

## 811 **Table Captions**

812 **Table 1 caption:** Native ranges and location of ethnobotanical use for 21 *Elymus* species.

813 **Table 2 caption:** Compilation of documented ethnobotanical records for 21 *Elymus* species.

814 “Unspecified” denotes where an indigenous community, plant part, or ethnobotanical use was  
815 not documented for a given species in the literature we consulted.

816

## 817 **Figure Captions**

818 **Figure 1 caption:** Geographic locations of collection sites for all specimens measured across 21  
819 *Elymus* species. Collection site determined from herbarium specimen label.

820 **Figure 2 caption:** Comparison of average floret area by use (medicine, food, forage, and  
821 material) and region (North America, Eurasia). Blue denotes a documented use within that  
822 ethnobotanical category. Red denotes no documented use within that ethnobotanical category.  
823 Significant differences ( $F_1 = 4.75$ ,  $P = 0.03$ ) found only for medicinal uses in North America  
824 (2a).

825

## 826 **Appendix Captions**

827 **Appendix 1 caption:** Herbarium specimen information from which florets were harvested for  
828 area measurements. \* = Specific latitudes and longitudes were not available at time of collection,

829 so coordinates were estimated in Google Earth for general analyses in R based off of detailed  
830 geographic information provided on the specimen.

831 **Appendix 2 caption:** Individual floret area measurements for 21 *Elymus* species and replicates.



## Herbarium Specimen Collection Locations

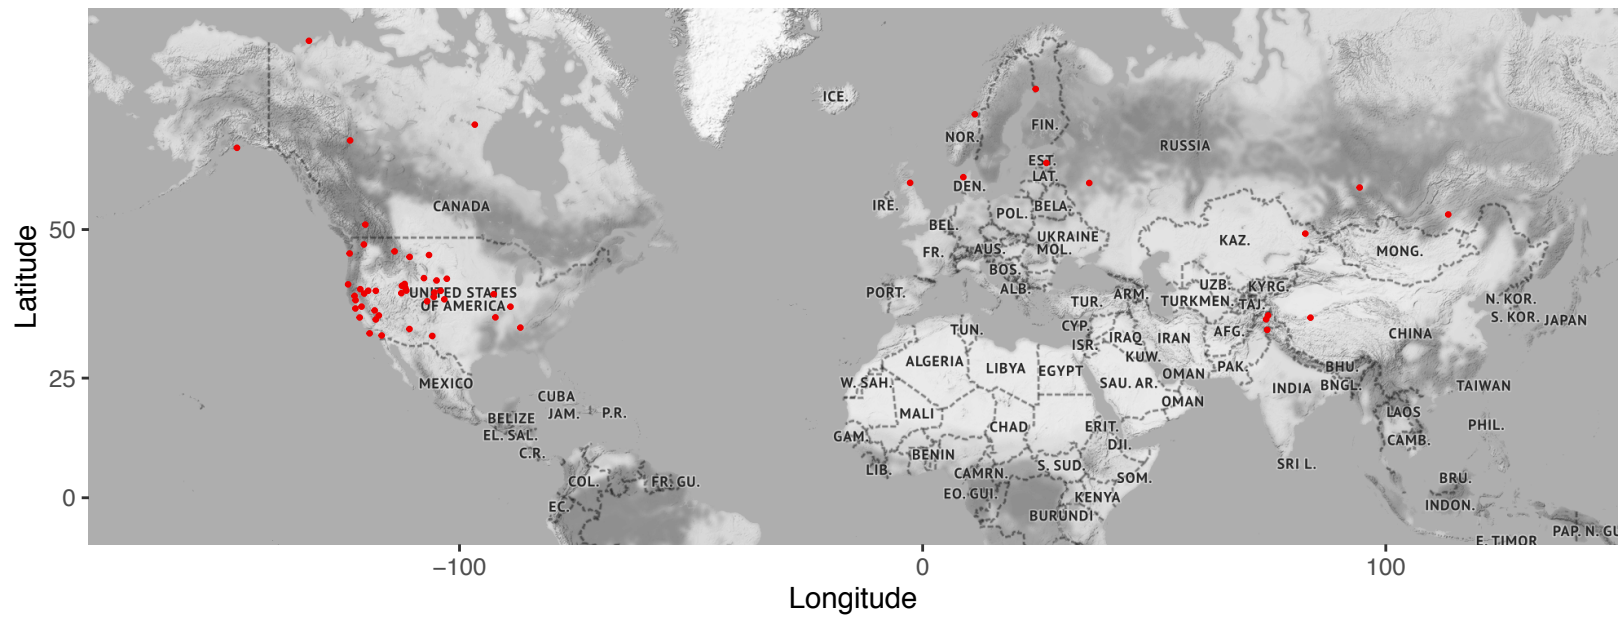

| <b>Species</b>                             | <b>Use Distribution</b>                                          | <b>Native Range</b>              |
|--------------------------------------------|------------------------------------------------------------------|----------------------------------|
| <i>E. arenarius</i> (L.)                   | Eurasia (NOR)                                                    | Eurasia                          |
| <i>E. canadensis</i> (L.)                  | North America (UT, CO)                                           | North America                    |
| <i>E. caninus</i> (L.)                     | Eurasia (RUS, CHN)                                               | Temperate Asia                   |
| <i>E. elongatus</i> (Host.)                | North America (USA, CAN)                                         | Eurasia                          |
| <i>E. elymoides</i> (Raf.)                 | North America (CA)                                               | North America,<br>Temperate Asia |
| <i>E. fibrosus</i> (Schrenk)               | Eurasia (RUS)                                                    | Temperate Asia                   |
| <i>E. glaucus</i> (Buckley)                | North America (CA, NM, BC)                                       | North America,<br>Temperate Asia |
| <i>E. hystrix</i> (Moench)                 | North America (FL)                                               | North America                    |
| <i>E. lanceolatus</i> (Scribn. & J.G. Sm.) | North America (USA, CAN)                                         | North America,<br>Temperate Asia |
| <i>E. mollis</i> (Trin.)                   | North America (AK, BC, WA)                                       | North America,<br>Eurasia        |
| <i>E. multisetus</i> (J.G. Sm.)            | North America (CA)                                               | North America                    |
| <i>E. mutabilis</i> (Drobow)               | Eurasia (RUS)                                                    | Eurasia                          |
| <i>E. repens</i> (L.)                      | North America (USA, CAN); Eurasia (FIN, SWE, RUS, TUR, BIH, IRL) | Eurasia                          |
| <i>E. semicostatus</i> (Nees ex Steud.)    | North America (USA); Eurasia (JPN)                               | Asia                             |
| <i>E. sibiricus</i> (L.)                   | North America (UT); Eurasia (RUS)                                | North America,<br>Eurasia        |
| <i>E. smithii</i> (Rydb.)                  | North America (USA, CAN)                                         | North America                    |
| <i>E. spicatus</i> (Pursh)                 | North America (USA)                                              | North America                    |
| <i>E. trachycaulus</i> (Link)              | North America (USA, CAN); Eurasia (RUS)                          | North America,<br>Eurasia        |
| <i>L. cinereus</i> (Scribn. & Merr.)       | North America (AB, BC, MT, UT, CA)                               | North America                    |
| <i>L. condensatus</i> (J. Presl)           | North America (UT, CA)                                           | North America                    |
| <i>L. triticoides</i> (Buckley)            | North America (CA)                                               | North America                    |

| Species                      | Indigenous Communities                                                                                 | Plant Part Used           | Food Uses                                                                                        | Medicinal Uses                                                    | Forage Uses                                                                                                           | Material Uses                                                                           | References                                                                                       |
|------------------------------|--------------------------------------------------------------------------------------------------------|---------------------------|--------------------------------------------------------------------------------------------------|-------------------------------------------------------------------|-----------------------------------------------------------------------------------------------------------------------|-----------------------------------------------------------------------------------------|--------------------------------------------------------------------------------------------------|
| <i>E. arenarius</i> (L.)     | Unspecified                                                                                            | Unspecified               | Unspecified                                                                                      | Unspecified                                                       | Unspecified                                                                                                           | Twisting ropes and making brooms.                                                       | Hooker 1839; Moerman 1998.                                                                       |
| <i>E. canadensis</i> (L.)    | Gosiute ( <b>G</b> ), Iroquois ( <b>I</b> ), Kiowa ( <b>K</b> ), Ute ( <b>U</b> ), Paiute ( <b>P</b> ) | Seeds, roots, and foliage | Gathered ( <b>G</b> , <b>U</b> ), ground into flour, used to make bread, cereals, rye casserole. | Compound decoction of roots taken for the kidneys ( <b>I</b> ).   | Fodder ( <b>K</b> ); forage for deer, antelope, and buffalo ( <b>P</b> ); cultivated as a pasture grass ( <b>P</b> ). | Unspecified                                                                             | Facciola 1990; Kindscher 1987; Kunkel 1984; Moerman 1998; Tanaka 1976; Yanovsky 1936.            |
| <i>E. caninus</i> (L.)       | Unspecified                                                                                            | Unspecified               | Unspecified                                                                                      | Unspecified                                                       | Forage grass.                                                                                                         | Unspecified                                                                             | Hanelt 2001.                                                                                     |
| <i>E. elongatus</i> (Host.)  | Unspecified                                                                                            | Unspecified               | Unspecified                                                                                      | Unspecified                                                       | Hay and pasture crop.                                                                                                 | Unspecified                                                                             | Hanelt 2001.                                                                                     |
| <i>E. elymoides</i> (Raf.)   | Navajo ( <b>N</b> ), Ramah ( <b>R</b> ), Potter Valley Pomo ( <b>PVP</b> )                             | Seeds                     | As pinole, considered second best quality after wild oats ( <b>PVP</b> ).                        | Unspecified                                                       | Young plants used for sheep and horse feed ( <b>N</b> , <b>R</b> ).                                                   | Unspecified                                                                             | Moerman 1998; Welch 2013.                                                                        |
| <i>E. fibrosus</i> (Schrenk) | Unspecified                                                                                            | Unspecified               | Unspecified                                                                                      | Unspecified                                                       | Minor forage crop.                                                                                                    | Unspecified                                                                             | Clayton et al. 2006; Hanelt 2001.                                                                |
| <i>E. glaucus</i> (Buckley)  | Karok ( <b>KA</b> ), Keres ( <b>KE</b> ), Gitksan ( <b>GI</b> )                                        | Seeds                     | As porridge (seeds parched, pounded into a flour, and mixed with water into a                    | To settle quarrels between families or individuals ( <b>KA</b> ). | Forage for deer, antelope, and buffalo; potential pasture and forage crop.                                            | Used in socks and stuffing inside moccasins, as baby bedding, and to cover ground where | Couplan 1998; Ebeling 1986; Hanelt 2001; Moerman 1998; Schenck 1952; Smith 1997; Smith Jr. 2014; |

|                                                  |                                                                                                          |                                       |                                                                       |                                                                                                                                                                                                           |                                                       |                                                                                                                                                     |                                                                         |
|--------------------------------------------------|----------------------------------------------------------------------------------------------------------|---------------------------------------|-----------------------------------------------------------------------|-----------------------------------------------------------------------------------------------------------------------------------------------------------------------------------------------------------|-------------------------------------------------------|-----------------------------------------------------------------------------------------------------------------------------------------------------|-------------------------------------------------------------------------|
|                                                  |                                                                                                          |                                       | paste),<br>cooked, or<br>ground into<br>bread flour<br>( <b>KA</b> ). |                                                                                                                                                                                                           |                                                       | people sat<br>around fire<br>( <b>GI</b> ).                                                                                                         | Tanaka 1976;<br>Yanovsky 1936.                                          |
| <i>E. hystrix</i><br>(Moench)                    | Iroquois                                                                                                 | Unspecified                           | Unspecified                                                           | Ceremonial:<br>decoction<br>for corn<br>seeds ( <b>I</b> ).                                                                                                                                               | Unspecified                                           | Unspecified                                                                                                                                         | Austin 2004.                                                            |
| <i>E. lanceolatus</i><br>(Scribn. &<br>J.G. Sm.) | Unspecified                                                                                              | Unspecified                           | Unspecified                                                           | Unspecified                                                                                                                                                                                               | Cultivated as<br>forage grass<br>and pasture<br>crop. | Unspecified                                                                                                                                         | Hanelt 2001.                                                            |
| <i>E. mollis</i><br>(Trin.)                      | Nitinaht ( <b>NI</b> ),<br>Makah ( <b>M</b> ),<br>Haida ( <b>H</b> ),<br>Nunivak<br>Eskimo ( <b>NE</b> ) | Seeds, stems,<br>leaves, and<br>roots | Seeds eaten.                                                          | Roots<br>twisted<br>together to<br>form rope,<br>rubbed on<br>the bodies<br>of young<br>men for<br>strength<br>( <b>NI</b> ); basal<br>portion of<br>stem<br>chewed for<br>incontinenc<br>e ( <b>M</b> ). | Unspecified                                           | Tough leaves<br>used for sewing<br>( <b>NI</b> ), plants<br>gathered, split,<br>dyed, and used<br>in basketry and<br>mats ( <b>H</b> ; <b>NE</b> ). | Couplan 1998;<br>Turner et al.<br>1983; Turner<br>2010; Lantis<br>1946. |
| <i>E. multisetus</i><br>(J.G. Sm.)               | Kawaiisu ( <b>KW</b> )                                                                                   | Seeds                                 | Pounded into<br>a<br>porridge/mush<br>( <b>KW</b> ).                  | Unspecified                                                                                                                                                                                               | Unspecified                                           | Unspecified                                                                                                                                         | Moerman 1998;<br>Smith Jr. 2014.                                        |
| <i>E. mutabilis</i>                              | Unspecified                                                                                              | Unspecified                           | Unspecified                                                           | Unspecified                                                                                                                                                                                               | Frost-                                                | Unspecified                                                                                                                                         | Hanelt 2001.                                                            |

|                       |                                                                                                                                                                   |                                                   |                                                                                                                                                                                                                                                  |                                                                                                                                                                                                                                                                                                                                             |                                                                                                                                                            |                                                        |                                                                                                                                         |
|-----------------------|-------------------------------------------------------------------------------------------------------------------------------------------------------------------|---------------------------------------------------|--------------------------------------------------------------------------------------------------------------------------------------------------------------------------------------------------------------------------------------------------|---------------------------------------------------------------------------------------------------------------------------------------------------------------------------------------------------------------------------------------------------------------------------------------------------------------------------------------------|------------------------------------------------------------------------------------------------------------------------------------------------------------|--------------------------------------------------------|-----------------------------------------------------------------------------------------------------------------------------------------|
| (Drobow)              |                                                                                                                                                                   |                                                   |                                                                                                                                                                                                                                                  |                                                                                                                                                                                                                                                                                                                                             | resistant forage grass.                                                                                                                                    |                                                        |                                                                                                                                         |
| <i>E. repens</i> (L.) | Apache ( <b>A</b> ), White Mountain ( <b>WM</b> ), Cherokee ( <b>CHE</b> ), Gosiute, Iroquois, Okanagan-Colville ( <b>OC</b> ), Lukomir Highlanders ( <b>LH</b> ) | Seeds, stems, rhizomes, roots, shoots, and leaves | Roots dried, ground into meal, and substituted for bread; rhizomes dried and ground, roasted for coffee, or boiled into a syrup for beer; seeds, tips of rhizomes, leaves and shoots eaten raw; seed mashed ( <b>A</b> ; <b>WM</b> ; <b>G</b> ). | Orthopedic and urinary aid ( <b>CHE</b> ; <b>I</b> ); decoction used to wash swollen legs and infusion taken for gravel, incontinence, and bedwetting ( <b>CHE</b> ); roots infused to make kidney and genitourinary treatment; rhizomes to treat kidney, liver, and urinary problems; worm expellant ( <b>I</b> ); to treat poor eyesight, | Fodder and forage plant for hay ( <b>A</b> ; <b>WM</b> ), N. American cultivar 'Newwhy' promising forage hybrid ( <i>E. repens</i> x <i>E. spicatus</i> ). | Used under and over food in pit cooking ( <b>OC</b> ). | Allen and Hatfield 2004; Elliot 2009; Ferrier et al. 2015; Hanelt 2001; Jackson 2014; MacKinnon et al. 2009; Moerman 1998; Sargin 2013. |

|                                         |             |               |                   |                                                                                                             |                                                                  |                |                                                                  |
|-----------------------------------------|-------------|---------------|-------------------|-------------------------------------------------------------------------------------------------------------|------------------------------------------------------------------|----------------|------------------------------------------------------------------|
|                                         |             |               |                   | chest pain, fever, syphilis, jaundice, and swollen and rheumatic limbs; other medicinal uses ( <b>LH</b> ). |                                                                  |                |                                                                  |
| <i>E. semicostatus</i> (Nees ex Steud.) | Unspecified | Unspecified   | Unspecified       | Unspecified                                                                                                 | Drought-resistant pasture grass.                                 | Unspecified    | Clayton et al. 2006; Hanelt 2001.                                |
| <i>E. sibiricus</i> (L.)                | Gosiute     | Seeds         | Yes ( <b>G</b> ). | Unspecified                                                                                                 | Infrequently cultivated as forage grass.                         | Unspecified    | Chamberlin 1911; Clayton et al. 2006; Hanelt 2001; Moerman 1998. |
| <i>E. smithii</i> (Rydb.)               | Unspecified | Unspecified   | Unspecified       | Unspecified                                                                                                 | Cultivated for hay and pasture.                                  | Unspecified    | Clayton et al. 2006; Hanelt 2001.                                |
| <i>E. spicatus</i> (Pursh)              | Unspecified | Unspecified   | Unspecified       | Unspecified                                                                                                 | Forage grass for natural pastures.                               | Unspecified    | Clayton et al. 2006; Hanelt 2001.                                |
| <i>E. trachycaulus</i> (Link)           | Unspecified | Seeds         | Unspecified       | Unspecified                                                                                                 | Cultivated mostly in grass mixtures as forage and pasture plant. | Unspecified    | Clayton et al. 2006; Hanelt 2001; Smith Jr. 2014.                |
| <i>L. cinereus</i>                      | Paiute,     | Seeds, stems, | Seeds eaten       | Unspecified                                                                                                 | Hay for                                                          | Stems used for | Ebeling 1986;                                                    |

|                                          |                                              |                  |                                                                   |             |                |                                                                                                                                                       |                                                                                                                |
|------------------------------------------|----------------------------------------------|------------------|-------------------------------------------------------------------|-------------|----------------|-------------------------------------------------------------------------------------------------------------------------------------------------------|----------------------------------------------------------------------------------------------------------------|
| (Scribn. & Merr.) Á. Löve                | Thompson (T), Blackfoot (B)                  | leaves, and culm | (P).                                                              |             | livestock (T). | basket imbrication; leaves used to line graves; culms used as "fish spreaders" or for cleaning; grass used as bedding (T).                            | Johnston 1970; Turner et al. 1996; Smith Jr. 2014.                                                             |
| <i>L. condensatus</i> (J. Presl) Á. Löve | Cahuilla (C), Gosiute, Paiute, Chumash (CH). | Stems, seeds     | Seeds, whole plant eaten (G; P)                                   | Unspecified | Unspecified    | Stems used in arrowmaking (C; CH), roof thatching (C), brush handles, knives, and tobacco pipes. Used in house construction, clothes, and tools (CH). | Bean and Saubel 1972; Couplan 1998; Ebeling 1986; Kindscher 1987; Moerman 1998; Smith Jr. 2014; Timbrook 1984. |
| <i>L. triticoides</i> (Buckley) Pilg.    | Paiute, Kawaiisu, Potter Valley Pomo         | Seeds            | Seeds pounded and cooked to form a thick mush (KW); pinole (PVP). | Unspecified | Unspecified    | Unspecified                                                                                                                                           | Ebeling 1986; Couplan 1998; Smith 1997; Smith Jr. 2014; Welch 2013; Zigmund 1981.                              |

a) Medicine

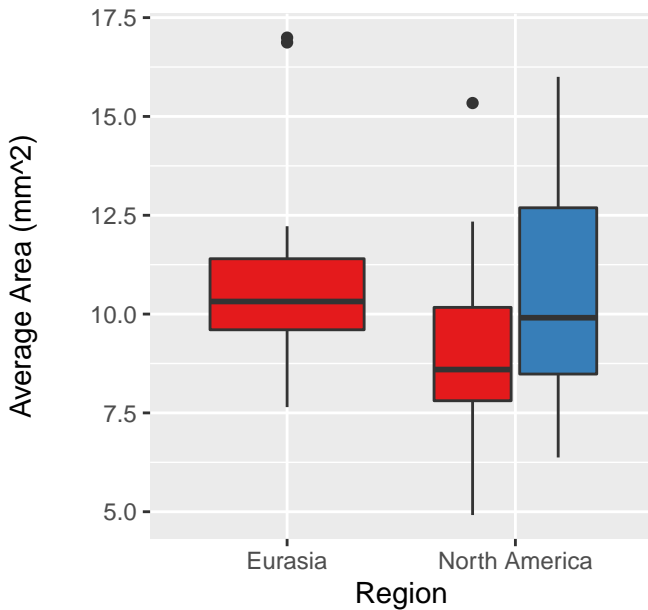

b) Food

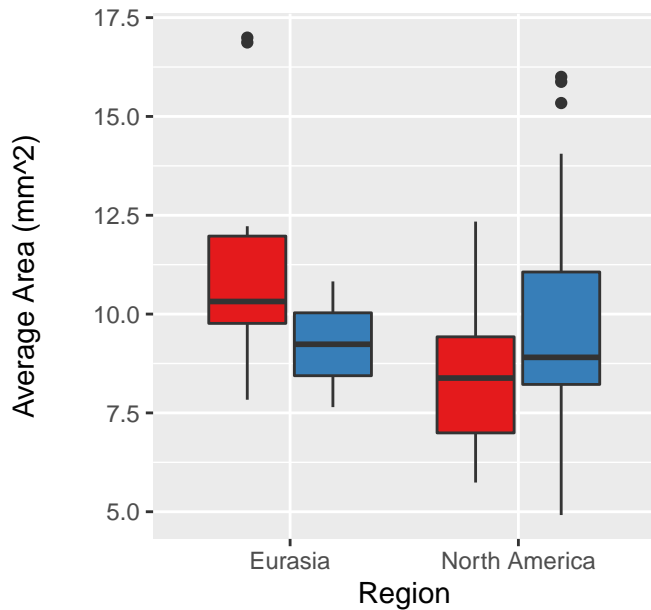

c) Forage

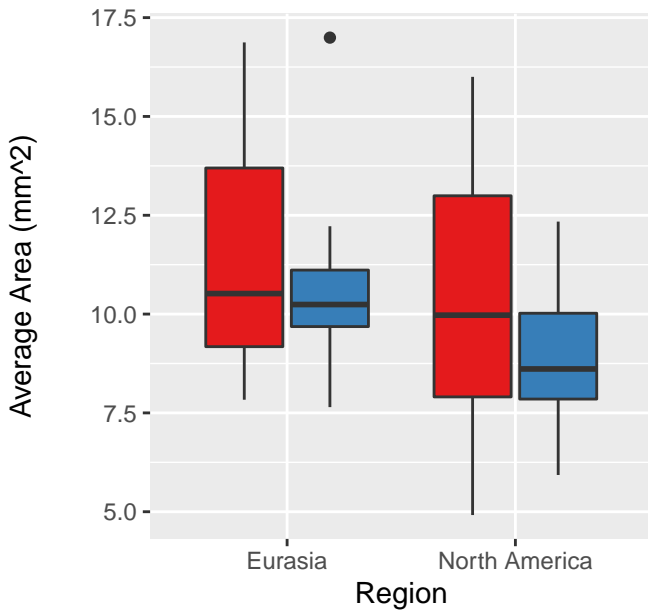

d) Material

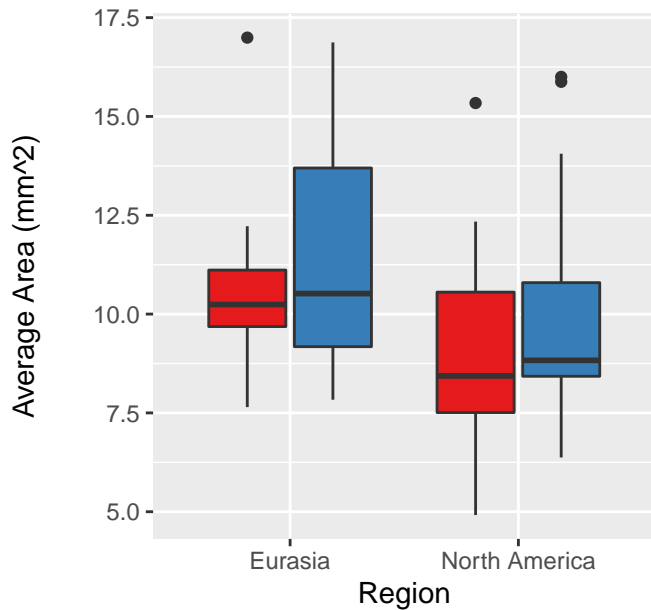

Source: https://www.biorxiv.org/content/10.1101/734525.full.pdf
